# Supplementary material for: Post-transcriptional repression of circadian component CLOCK regulates cancer-stemness in murine breast cancer cells
Source: eLife. 2021 Apr 23;10:e66155. doi: 10.7554/eLife.66155 (PMC8102063; doi:10.7554/eLife.66155)
Supplement: Figure 1—figure supplement 1—source data 1. [file elife-66155-fig1-figsupp1-data1.xlsx]

## Sheet: Contents
Ogino and Matsunaga et al eLife
Supplemental Figure S1 - Source Data File 1
A - Supplemental Figure S1: The mRNA expression of clock genes in 4T1 cells transfected with vectors expressing Bmal1, Clock, Cry1, Per1, or Per2

## Sheet: A
	Replicate	Ratio of Bmal1/18s rRNA	Average	SD
pcDNA	1	0.995761	1	0.00734176
	2	1.00848
	3	0.995761
Bmal1	1	8.29674	8.16329	0.403613
	2	7.70985
	3	8.48328
Clock	1	1.24925	1.17388	0.0713358
	2	1.16496
	3	1.10742
Cry1	1	1.44461	1.38493	0.106092
	2	1.44775
	3	1.26244
Per1	1	1.00922	1.03157	0.0574845
	2	1.09687
	3	0.988614
Per2	1	1.19032	1.18194	0.0355381
	2	1.14297
	3	1.21255
	Replicate	Ratio of Clock/18s rRNA	Average	SD
pcDNA	1	0.992798	1	0.0249287
	2	1.02774
	3	0.979465
Bmal1	1	1.17956	1.14167	0.0874692
	2	1.04165
	3	1.20381
Clock	1	29.537	29.9548	0.904926
	2	29.3343
	3	30.9931
Cry1	1	1.31863	1.2925	0.0616921
	2	1.33682
	3	1.22204
Per1	1	0.953803	0.893175	0.0525887
	2	0.86581
	3	0.859911
Per2	1	1.11613	1.09096	0.0229157
	2	1.08545
	3	1.07131
	Replicate	Ratio of Cry1/18s rRNA	Average	SD
pcDNA	1	1.0751	1	0.0651204
	2	0.959258
	3	0.965637
Bmal1	1	1.01157	0.93722	0.0646608
	2	0.894125
	3	0.905964
Clock	1	0.986968	0.98758	0.0435691
	2	1.03145
	3	0.944321
Cry1	1	312.489	303.568	8.09257
	2	301.515
	3	296.699
Per1	1	0.858167	0.941599	0.0795364
	2	0.950068
	3	1.01656
Per2	1	2.5927	2.69226	0.133006
	2	2.84332
	3	2.64077
	Replicate	Ratio of Per1/18s rRNA	Average	SD
pcDNA	1	1.03438	1	0.0314542
	2	0.97267
	3	0.992949
Bmal1	1	1.01124	0.979795	0.0381519
	2	0.937352
	3	0.990794
Clock	1	0.99818	0.971356	0.0350803
	2	0.931658
	3	0.98423
Cry1	1	4.52374	4.71242	0.354051
	2	5.12085
	3	4.49268
Per1	1	99.4128	100.366	2.25697
	2	98.7424
	3	102.943
Per2	1	1.00064	0.98026	0.117737
	2	0.853663
	3	1.08648
	Replicate	Ratio of Per2/18s rRNA	Average	SD
pcDNA	1	1.14231	1	0.128725
	2	0.966017
	3	0.891676
Bmal1	1	0.735765	0.85082	0.102536
	2	0.932542
	3	0.884155
Clock	1	0.938536	0.913079	0.0546011
	2	0.950304
	3	0.850399
Cry1	1	0.839896	0.981946	0.233613
	2	1.25157
	3	0.854372
Per1	1	0.784519	0.857041	0.479742
	2	0.417689
	3	1.36892
Per2	1	81.5661	79.9779	1.41791
	2	78.8393
	3	79.5283
