# Supplementary material for: Post-transcriptional repression of circadian component CLOCK regulates cancer-stemness in murine breast cancer cells
Source: eLife. 2021 Apr 23;10:e66155. doi: 10.7554/eLife.66155 (PMC8102063; doi:10.7554/eLife.66155)
Supplement: Figure 1—source data 1. [file elife-66155-fig1-data1.xlsx]

## Sheet: Contents
Ogino and Matsunaga et al eLife
Figure 1 - Source Data File 1
A - Figure 1A: Soft agar colony formation assay of ALDH-negative and ALDH-positive 4T1 cells
B - Figure 1B: Influence of each clock gene expression vector on the ratio of ALDH positive- to negative-cell populations
C - Figure 1C: The temporal mRNA expression profiles of clock genes in ALDH-positive and ALDH-negative cells isolated from 4T1 tumor-bearing mice
D - Figure 1D: Difference in the expression levels of CLOCK protein between ALDH-negative and -positive 4T1 cells
E - Figure 1E: Difference in the promoter activities of E-box-driven luciferase reporter in ALDH-negative and -positive 4T1 cells
F - Figure 1F: The influence of lenti-viral CLOCK transduction on the circadian oscillation of E-box-driven luciferase bioluminescence
G - Figure 1F: Amplitude of bioluminescence (day5 to day10) in Figure 1F

## Sheet: A
				number of spheroid formed by ALDH-negative cells
			area of spheroid (nm2)	1	2	3	4	Average	SD
			8000~	1	1	4	0	1.5	1.73205
			6000~7999	0	0	1	0	0.25	0.5
			4000~5999	1	0	1	2	1	0.816497
			2000~3999	0	1	0	1	0.5	0.57735
			~1999	0	4	4	0	2	2.3094
			total number	2	6	10	3	5.25	3.59398
				number of spheroid formed by ALDH-positive cells
			area of spheroid (nm2)	1	2	3	4	Average	SD
			8000~	20	18	17	12	16.75	3.40343
			6000~7999	5	3	7	6	5.25	1.70783
			4000~5999	11	9	13	5	9.5	3.41565
			2000~3999	12	8	11	11	10.5	1.73205
			~1999	52	33	42	62	47.25	12.5266
			total number	100	71	90	96	89.25	12.842

## Sheet: B
	Replicate	Ratio of ALDH-positive/ALDH-negative cells	Average	SD
pcDNA	1	1.1651	1	0.115702
	2	1.0916
	3	1.02137
	4	0.920234
	5	0.949872
	6	0.851827
Bmal1	1	1.02499	0.808314	0.155296
	2	0.91687
	3	0.796835
	4	0.82938
	5	0.692033
	6	0.589781
Clock	1	0.688602	0.571381	0.130881
	2	0.697231
	3	0.673349
	4	0.518902
	5	0.417229
	6	0.432974
Cry1	1	1.00732	0.790866	0.156051
	2	0.750572
	3	0.946453
	4	0.770394
	5	0.624974
	6	0.645483
Per1	1	1.07739	0.84465	0.150596
	2	0.84615
	3	0.933649
	4	0.813233
	5	0.636525
	6	0.760959
Per2	1	0.72759	0.677326	0.109904
	2	0.772177
	3	0.8217
	4	0.582254
	5	0.573398
	6	0.586837

## Sheet: C
	ZT	Replicate	Ratio of CLOCK/b-Actin	Average	SD			ZT	Replicate	Ratio of PER2/b-Actin	Average	SD
ALDH-negative cells	2	1	1.04842	1	0.078242		ALDH-negative cells	2	1	0.287382	0.520041	0.211169
		2	1.04185						2	0.573167
		3	0.909734						3	0.699574
	6	1	0.583615	0.680822	0.142792			6	1	0.981158	1	0.124979
		2	0.614088						2	0.885511
		3	0.844764						3	1.13333
	10	1	0.611393	0.457863	0.143123			10	1	0.388107	0.287697	0.0875866
		2	0.434068						2	0.227015
		3	0.328129						3	0.247968
	14	1	0.514786	0.568707	0.0967009			14	1	0.551235	0.533082	0.05159
		2	0.51099						2	0.573142
		3	0.680347						3	0.474869
	18	1	1.14943	0.895965	0.222224			18	1	0.242231	0.541585	0.331748
		2	0.80389						2	0.484267
		3	0.734577						3	0.898258
	22	1	0.370158	0.464344	0.116451			22	1	0.301104	0.319098	0.0483882
		2	0.428326						2	0.282284
		3	0.594548						3	0.373905
ALDH-positive cells	2	1	0.0548573	0.0403637	0.0146736		ALDH-positive cells	2	1	0.185302	0.189226	0.00648289
		2	0.040717						2	0.185668
		3	0.0255166						3	0.196709
	6	1	0.0537561	0.0594253	0.00868707			6	1	0.0471789	0.0514281	0.00575029
		2	0.0550933						2	0.0579713
		3	0.0694265						3	0.0491342
	10	1	0.0695539	0.057069	0.0108283			10	1	0.371278	0.380198	0.0178863
		2	0.050237						2	0.368525
		3	0.0514161						3	0.40079
	14	1	0.0378134	0.0500987	0.0118627			14	1	0.159577	0.133786	0.0236255
		2	0.061488						2	0.128591
		3	0.0509946						3	0.11319
	18	1	0.0349799	0.0369568	0.00253005			18	1	0.135081	0.203717	0.0611045
		2	0.0398081						2	0.252196
		3	0.0360826						3	0.223875
	22	1	0.0435851	0.05173	0.0108531			22	1	0.138597	0.109498	0.0257884
		2	0.0475542						2	0.0894734
		3	0.0640508						3	0.100424

## Sheet: D
	Replicate	Ratio of CLOCK/p84	Average	SD
ALDH-negative cells	1	0.780212	1	0.206767
	2	1.02913
	3	1.19066
ALDH-positive cells	1	0.55214	0.491282	0.0888539
	2	0.532388
	3	0.389318

## Sheet: E
pGL4.13	Replicate	Ratio of luciferase activity	Average	SD
ALDH-negative cells	1	0.98602	1	0.0308563
	2	0.978608
	3	1.03537
ALDH-positive cells	1	1.04206	1.09525	0.0468436
	2	1.11336
	3	1.13034
3xEbox::Luc	Replicate	Ratio of luciferase activity	Average	SD
ALDH-negative cells	1	1.01329	1	0.0130133
	2	0.98728
	3	0.999433
ALDH-positive cells	1	0.54287	0.540926	0.0129642
	2	0.552808
	3	0.527099

## Sheet: F
	counts/sec			counts/sec
	Mock-transduced			CLOCK-transduced
time (day)	1	2	3	1	2	3
0.57292	145.46	140.788	152.958	199.64	179.54	175.277
0.57986	150.909	143.529	183.563	203.723	163.903	178.744
0.58681	153.797	146.214	186.75	198.551	144.708	153.718
0.59375	135.121	129.32	164.903	174.211	123.019	135.966
0.60069	113.521	118.824	144.631	156.113	109.321	108.244
0.60764	95.538	98.812	120.921	132.92	94.227	100.105
0.61458	91.124	88.51	101.092	107.913	71.075	80.567
0.62153	81.95	78.109	96.424	85.174	73.318	69.761
0.62847	70.883	67.084	81.039	79.633	59.054	53.275
0.63542	51.346	54.369	66.133	65.49	47.601	39.266
0.64236	48.169	48.13	54.473	50.503	33.767	26
0.64931	45.926	34.169	47.771	38.708	21.926	16.873
0.65625	25.453	25.164	40.039	27.946	13.352	5.821
0.66319	11.997	21.803	20.278	11.315	14.667	-4.688
0.67014	8.968	9.437	14.914	1.915	-3.52	-10.999
0.67708	0.749	6.112	10.331	-5.474	-4.209	-15.889
0.68403	-4.509	-3.522	-3.299	-10.962	-10.707	-20.569
0.69097	-11.309	-11.819	-8.657	-23.273	-22.704	-24.471
0.69792	-13.908	-16.603	-9.417	-33.808	-21.949	-37.269
0.70486	-18.832	-22.713	-21.827	-34.721	-27.529	-46.87
0.71181	-22.418	-30.298	-28.001	-40.659	-36.394	-46.557
0.71875	-27.871	-33.425	-32.917	-45.916	-38.231	-48.684
0.72569	-30.159	-39.85	-39.955	-51.236	-40.627	-56.562
0.73264	-40.464	-45.735	-41.112	-59.9	-47.232	-64.224
0.73958	-42.314	-55.398	-45.843	-61.445	-45.949	-65.026
0.74653	-48.146	-56.395	-50.806	-70.3	-56.481	-68.278
0.75347	-46.65	-58.57	-51.618	-66.738	-58.639	-69.903
0.76042	-53.287	-67.598	-55.838	-68.86	-64.531	-75.908
0.76736	-57.852	-67.953	-60.785	-74.945	-68.994	-73.609
0.77431	-63.207	-72.421	-62.588	-79.544	-75.39	-73.003
0.78125	-70.223	-75.685	-64.683	-81.492	-72.437	-76.487
0.78819	-69.518	-76.82	-64.211	-77.569	-71.427	-82.045
0.79514	-71.71	-80.038	-67.402	-87.095	-85.022	-82.343
0.80208	-77.809	-83.73	-70.49	-84.739	-81.693	-78.723
0.80903	-77.784	-86.166	-73.43	-82.848	-86.076	-87.132
0.81597	-81.034	-88.823	-75.257	-88.853	-88.821	-84.129
0.82292	-87.286	-86.971	-77.322	-86.997	-90.386	-83.165
0.82986	-85.22	-90.793	-80.321	-82.834	-91.025	-86.026
0.83681	-84.427	-92.704	-77.116	-88.887	-90.673	-83.123
0.84375	-91.522	-90.779	-77.494	-90.458	-91.537	-86.368
0.85069	-89.712	-91.668	-81.01	-90.335	-97.75	-86.124
0.85764	-90.173	-90.294	-80.91	-95.785	-94.727	-85.284
0.86458	-91.457	-89.091	-81.089	-91.961	-94.786	-87.086
0.87153	-88.55	-91.119	-80.74	-95.228	-92.34	-83.6
0.87847	-87.011	-89.442	-80.892	-92.164	-95.655	-80.028
0.88542	-92.502	-89.963	-86.41	-92.513	-97.084	-84.121
0.89236	-90.539	-93.06	-86.021	-96.409	-94.153	-84.768
0.89931	-89.278	-92.19	-86.95	-100.829	-97.044	-81.419
0.90625	-89.939	-89.465	-84.815	-103.729	-97.247	-79.877
0.91319	-90.871	-86.741	-84.127	-100.382	-98.103	-82.194
0.92014	-91.967	-84.893	-82.296	-100.893	-97.001	-83.871
0.92708	-89.977	-88.572	-81.637	-100.76	-94.733	-84.963
0.93403	-86.286	-85.874	-82.68	-102.193	-99.735	-84.108
0.94097	-84.313	-85.447	-87.118	-104.477	-96.191	-88.5
0.94792	-87.209	-83.387	-86.528	-105.756	-93.572	-85.327
0.95486	-85.551	-82.116	-84.278	-103.14	-94.664	-83.797
0.96181	-83.544	-81.402	-86.977	-104.841	-96.073	-81.192
0.96875	-86.93	-81.405	-84.921	-103.5	-97.416	-84.039
0.97569	-86.899	-81.021	-81.874	-106.77	-94.66	-80.681
0.98264	-84.796	-76.623	-85.884	-108.081	-95.345	-80.728
0.98958	-84.77	-76.792	-87.616	-108.407	-93.433	-80.64
0.99653	-82.425	-74.2	-84.739	-106.364	-90.412	-79.647
1.00347	-81.178	-71.709	-82.06	-102.601	-90.161	-83.362
1.01042	-78.496	-73.346	-82.44	-103.833	-89.582	-80.13
1.01736	-75.832	-71.024	-84.948	-106.526	-87.245	-78.841
1.02431	-73.566	-68.481	-83.124	-102.98	-86.508	-78.878
1.03125	-72.276	-65.951	-83.482	-107.371	-85.457	-82.098
1.03819	-73.185	-69.141	-80.664	-103.817	-85.479	-82.549
1.04514	-71.701	-67.079	-81.192	-104.248	-83.287	-79.592
1.05208	-70.554	-65.19	-82.067	-102.529	-83.214	-77.998
1.05903	-69.307	-63.799	-80.376	-99.73	-81.906	-78.861
1.06597	-67.02	-62.791	-78.777	-98.384	-81.796	-76.49
1.07292	-65.391	-61.143	-78.32	-98.436	-78.822	-73.662
1.07986	-62.902	-57.974	-75.568	-95.208	-77.66	-72.021
1.08681	-61.984	-55.495	-75.306	-93.249	-80.322	-75.739
1.09375	-62.832	-53.108	-71.882	-97.026	-77.835	-73.957
1.10069	-61.432	-51.802	-69.81	-95.157	-76.467	-75.113
1.10764	-61.725	-54.778	-70.493	-92.308	-74.307	-73.225
1.11458	-59.764	-52.855	-71.317	-94.304	-72.477	-71.019
1.12153	-57.877	-49.891	-71.583	-93.251	-71.811	-72.332
1.12847	-58.533	-48.17	-69.813	-91.904	-71.816	-69.647
1.13542	-57.526	-45.673	-67.93	-89.951	-72.641	-68.799
1.14236	-56.169	-45.961	-66.205	-88.478	-72.774	-68.9
1.14931	-54.758	-45.391	-64.877	-89.326	-74.381	-72.6
1.15625	-52.932	-46.25	-66.867	-87.735	-73.204	-74.332
1.16319	-51.762	-45.126	-66.048	-86.818	-72.605	-73.244
1.17014	-52.885	-44.009	-66.265	-86.678	-71.215	-71.903
1.17708	-52.59	-41.891	-64.13	-85.452	-70.847	-71.064
1.18403	-52.458	-40.129	-64.684	-85.19	-69.586	-72.154
1.19097	-50.951	-40.178	-63.78	-84.247	-74.033	-72.642
1.19792	-48.51	-42.395	-62.949	-88.788	-73.468	-71.776
1.20486	-47.865	-43.081	-63.278	-88.132	-73.708	-72.489
1.21181	-50.651	-41.186	-64.941	-87.786	-73.751	-71.45
1.21875	-50.164	-41.467	-64.868	-86.076	-73.742	-74.086
1.22569	-48.655	-39.823	-64.403	-87.059	-73.551	-76.818
1.23264	-48.279	-40.713	-64.021	-89.166	-73.688	-76.692
1.23958	-48.009	-40.309	-60.881	-89.434	-72.554	-76.293
1.24653	-49.3	-40.15	-60.612	-89.353	-72.612	-74.507
1.25347	-46.834	-40.038	-61.069	-89.556	-72.742	-75.616
1.26042	-47.638	-39.767	-60.936	-86.021	-74.05	-75.821
1.26736	-47.441	-40.051	-60.791	-87.412	-75.245	-76.38
1.27431	-47.483	-40.329	-60.841	-86.626	-75.657	-76.676
1.28125	-47.604	-40.459	-64.531	-86.997	-72.983	-78.245
1.28819	-46.154	-39.846	-64.678	-84.981	-72.177	-75.379
1.29514	-46.372	-40.051	-59.388	-85.451	-72.455	-74.379
1.30208	-46.626	-40.301	-59.651	-87.148	-72.779	-74.994
1.30903	-45.565	-39.699	-59.985	-87.751	-72.844	-75.639
1.31597	-45.936	-38.765	-59.688	-84.716	-73.9	-71.853
1.32292	-46.353	-39.184	-58.16	-84.133	-73.629	-70.6
1.32986	-47.482	-39.743	-58.637	-84.028	-74.455	-70.732
1.33681	-47.995	-40.24	-57.818	-82.119	-72.017	-72.238
1.34375	-45.276	-38.879	-57.842	-83.155	-72.223	-72.884
1.35069	-44.616	-39.402	-58.621	-83.915	-73.062	-73.825
1.35764	-44.743	-41.271	-57.061	-82.718	-70.729	-71.619
1.36458	-45.217	-41.846	-58.829	-81.239	-71.797	-70.639
1.37153	-43.362	-38.809	-58.399	-84.855	-71.108	-69.991
1.37847	-43.666	-39.02	-58.245	-83.441	-69.521	-71.056
1.38542	-43.283	-35.466	-54.498	-81.972	-69.531	-68.554
1.39236	-44.036	-37.578	-54.204	-77.736	-70.125	-67.771
1.39931	-43.002	-36.448	-53.6	-78.68	-65.538	-68.975
1.40625	-43.775	-35.492	-50.453	-79.487	-65.704	-69.506
1.41319	-41.392	-36.027	-49.999	-80.849	-65.742	-69.898
1.42014	-40.917	-36.738	-49.305	-76.86	-61.119	-65.434
1.42708	-41.068	-33.72	-46.381	-69.456	-60.115	-66.736
1.43403	-39.735	-34.428	-47.305	-70.91	-61.486	-65.759
1.44097	-40.223	-32.841	-48.258	-71.964	-57.873	-62.387
1.44792	-38.082	-33.611	-47.124	-70.322	-57.449	-63.088
1.45486	-38.558	-31.153	-46.235	-67.839	-55.271	-61.754
1.46181	-35.81	-31.025	-42.361	-67.262	-53.602	-56.469
1.46875	-33.654	-31.801	-42.838	-62.114	-52.282	-56.689
1.47569	-32.279	-32.594	-43.224	-61.164	-48.721	-58.174
1.48264	-31.729	-30.219	-40.663	-60.548	-45.17	-57.556
1.48958	-31.255	-29.113	-36.85	-60.805	-44.738	-55.707
1.49653	-29.062	-26.071	-34.936	-53.998	-41.378	-53.089
1.50347	-27.489	-24.772	-35.674	-53.219	-42.086	-48.806
1.51042	-27.745	-24.872	-33.618	-51.248	-42.27	-47.76
1.51736	-26.099	-24.817	-32.679	-45.35	-38.84	-48.315
1.52431	-23.095	-22.422	-30.098	-45.753	-37.995	-45.829
1.53125	-22.449	-21.262	-29.629	-42.041	-33.989	-43.805
1.53819	-21.108	-18.299	-28.53	-40.249	-26.817	-40.548
1.54514	-18.749	-18.736	-25.833	-41.042	-26.699	-39.227
1.55208	-18.824	-18.26	-26.771	-38.134	-25.371	-36.784
1.55903	-16.621	-17.769	-27.784	-34.013	-17.889	-36.144
1.56597	-9.425	-17.162	-19.982	-33.466	-18.231	-28.849
1.57292	-10.381	-8.664	-19.566	-32.544	-17.978	-30.214
1.57986	-9.416	-9.493	-18.019	-24.654	-13.313	-27.501
1.58681	-7.147	-10.048	-18.883	-21.766	-10.337	-26.936
1.59375	-7.976	-8.117	-9.872	-17.593	-11.263	-24.434
1.60069	-2.335	-5.079	-7.653	-14.582	-2.932	-17.74
1.60764	-2.555	-4.385	-3.76	-5.904	-2.011	-15.932
1.61458	-2.068	0.978	-3.757	-7.538	0.854	-17.291
1.62153	0.394	0.653	-5.037	-3.66	7.375	-8.782
1.62847	1.461	2.385	0.899	-2.3	9.878	-9.101
1.63542	6.159	2.229	0.315	3.711	12.061	-1.961
1.64236	6.965	2.38	3.572	6.461	17.629	-0.322
1.64931	10.675	5.525	7.333	10.475	20.089	1.075
1.65625	15.303	9.844	13.488	16.454	28.431	7.254
1.66319	15.131	10.595	12.309	20.652	32.074	12.806
1.67014	20.047	11.881	17.97	20.407	32.475	12.386
1.67708	19.415	11.997	16.71	26.692	32.642	21.202
1.68403	25.37	20.259	16.36	27.892	40.697	19.937
1.69097	24.402	19.77	21.196	29.911	40.443	20.313
1.69792	24.758	20.175	21.796	34.028	43.927	20.767
1.70486	28.38	25.155	27.628	36.38	46.802	27.419
1.71181	29.61	24.299	30.061	38.359	46.485	29.007
1.71875	34.882	24.504	28.93	45.644	53.637	31.819
1.72569	35.017	30.054	32.07	49.975	57.943	31.951
1.73264	35.375	29.411	32.364	51.165	56.836	35.096
1.73958	36.432	29.95	33.549	52.784	57.484	38.368
1.74653	38.997	33.431	33.582	54.881	60.239	41.284
1.75347	39.857	35.603	37.291	61.554	67.468	46.152
1.76042	38.915	36.426	38.265	65.91	68.195	47.474
1.76736	43.648	36.83	45.132	69.296	67.909	47.664
1.77431	44.719	40.039	46.503	68.379	69.839	45.816
1.78125	46.974	40.147	45.98	71.329	75.93	52.653
1.78819	47.763	39.892	47.626	77.177	74.402	53.07
1.79514	46.861	39.325	48.755	75.236	72.87	54.723
1.80208	46.121	38.964	52.43	76.888	73.346	61.263
1.80903	47.413	43.348	54.96	74.972	73.61	63.548
1.81597	49.197	42.573	54.341	74.277	75.432	65.302
1.82292	48.86	43.823	55.991	78.124	75.768	63.483
1.82986	50.404	46.707	55.171	78.284	75.889	64.272
1.83681	50.791	45.925	53.91	80.024	78.293	63.443
1.84375	49.901	43.404	52.66	80.17	76.807	67.365
1.85069	46.023	42.632	53.057	78.303	75.167	66.137
1.85764	45.185	44.368	57.285	78.085	73.682	66.949
1.86458	44.236	43.563	56.05	81.875	72.197	65.14
1.87153	48.858	41.985	53.134	81.366	70.934	66.6
1.87847	48.743	41.243	51.898	79.91	68.966	65.243
1.88542	49.105	43.011	56.763	79.317	68.069	64.712
1.89236	48.289	42.301	55.593	80.227	66.816	67.259
1.89931	47.854	40.445	54.422	81.985	67.226	68.232
1.90625	47.032	39.721	55.377	76.8	66.495	66.453
1.91319	49.411	39.455	54.237	75.622	65.069	62.582
1.92014	48.609	38.747	49.182	73.826	64.53	60.812
1.92708	45.216	38.039	48.085	76.089	61.437	62.152
1.93403	42.972	36.078	49.592	74.383	60.079	60.671
1.94097	42.227	35.782	48.518	68.104	55.877	58.694
1.94792	41.236	35.135	47.4	66.354	51.903	57.309
1.95486	39.081	34.487	43.544	65.616	50.611	53.74
1.96181	37.899	32.86	42.468	63.93	49.961	56.09
1.96875	35.659	30.1	43.746	63.394	48.698	51.832
1.97569	33.24	29.484	42.72	59.825	47.428	52.857
1.98264	32.963	29.388	41.065	59.842	45.116	53.159
1.98958	32.323	29.39	39.437	56.98	43.894	54.468
1.99653	31.704	28.792	35.756	55.363	40.164	50.514
2.00347	31.017	27.715	34.535	53.774	37.056	48.945
2.01042	29.801	27.181	33.155	51.444	35.866	47.413
2.01736	26.308	26.654	31.67	49.555	32.057	44.708
2.02431	24.523	21.796	28.989	46.18	29.633	40.48
2.03125	23.982	19.705	29.938	44.707	27.309	38.997
2.03819	23.451	18.733	29.643	42.271	26.447	40.517
2.04514	23.765	17.544	28.826	38.606	25.23	39.091
2.05208	23.281	17.108	23.343	35.907	20.866	37.44
2.05903	17.911	13.981	22.519	31.817	16.311	33.532
2.06597	15.832	12.318	21.72	27.24	13.042	31.448
2.07292	15.435	11.597	17.35	25.449	12.096	27.468
2.07986	13.631	11.229	16.636	22.583	11.2	26.148
2.08681	12.708	9.368	17.13	21.58	9.69	23.838
2.09375	9.984	9.024	16.453	14.56	8.831	21.171
2.10069	9.631	8.382	15.848	19.17	3.584	19.931
2.10764	8.464	7.815	15.368	12.168	0.065	18.75
2.11458	6.9	7.51	14.817	11.074	1.012	18.342
2.12153	6.614	4.737	10.364	9.951	-1.921	17.189
2.12847	6.172	4.484	6.884	8.202	-0.349	16.083
2.13542	3.886	5.194	9.292	6.608	-1.912	8.988
2.14236	3.346	5.001	8.146	3.54	-2.506	7.24
2.14931	1.73	2.201	7.674	-2.008	-8.38	6.263
2.15625	0.621	2.041	7.244	-2.98	-8.862	4.493
2.16319	0.512	1.867	7.878	-3.818	-9.605	6.214
2.17014	0.417	2.536	7.51	-0.543	-11.789	3.034
2.17708	-1.261	1.643	3.304	-1.334	-12.226	2.227
2.18403	-1.931	-0.852	2.519	-4.09	-12.568	1.483
2.19097	-1.937	-1.722	1.372	-7.894	-13.243	-1.821
2.19792	-0.682	-2.923	1.1	-8.55	-13.55	-2.553
2.20486	-0.681	-2.942	1.941	-8.507	-12.779	-4.1
2.21181	-3.66	-1.423	1.734	-9.095	-13.047	-4.756
2.21875	-3.586	-1.389	2.71	-10.995	-14.216	-3.062
2.22569	-2.17	-3.397	2.802	-12.802	-17.016	-3.241
2.23264	-2.069	-3.319	2.665	-13.281	-18.125	-4.287
2.23958	-3.385	-2.918	-0.856	-13.73	-18.289	-4.62
2.24653	-3.265	-2.513	-2.923	-14.231	-21.188	-5.18
2.25347	-3.117	-2.068	-3.024	-15.727	-22.874	-5.684
2.26042	-3.805	-1.918	-3.091	-18.7	-22.968	-6.31
2.26736	-8.924	-3.41	-6.072	-16.344	-23.468	-7.333
2.27431	-8.716	-3.284	-2.407	-16.636	-21.779	-7.25
2.28125	-5.089	-3.069	-4.892	-14.295	-19.52	-6.976
2.28819	-4.839	-5.721	-4.866	-14.578	-18.665	-7.345
2.29514	-5.564	-5.274	-4.82	-11.115	-15.827	-9.939
2.30208	-5.311	-5.085	-2.006	-11.347	-17.761	-10.311
2.30903	-5.071	-4.87	-1.951	-16.265	-16.896	-9.155
2.31597	-7.555	-4.777	-2.926	-18.127	-16.824	-9.455
2.32292	-7.916	-5.335	-2.845	-18.342	-16.738	-9.73
2.32986	-7.654	-5.091	-2.754	-19.417	-15.263	-7.216
2.33681	-6.939	-5.885	-3.843	-18.701	-18.857	-6.649
2.34375	-6.652	-5.617	-3.822	-16.056	-15.069	-6.947
2.35069	-9.454	-5.061	-3.706	-16.179	-15.289	-7.004
2.35764	-9.212	-1.283	-3.579	-17.743	-15.201	-6.993
2.36458	-9.179	-1.015	-3.181	-18.003	-17.289	-7.51
2.37153	-8.471	-1.084	-1.203	-18.071	-17.487	-5.003
2.37847	-8.191	-5.944	-2.931	-20.536	-17.384	-3.088
2.38542	-7.89	-0.65	-5.622	-17.24	-13.974	-3.266
2.39236	-6.519	-5.647	-6.724	-17.175	-12.908	-8.807
2.39931	-7.354	-2.884	-5.305	-12.003	-12.806	-8.968
2.40625	-3.12	-2.599	-4.171	-11.997	-8.523	-3.63
2.41319	-2.667	-2.32	-3.984	-13.015	-12.873	-3.773
2.42014	-2.352	-2.513	-3.566	-13.276	-7.587	-3.87
2.42708	-6.762	-2.25	-6.996	-13.285	-9.783	-4.463
2.43403	-6.444	-1.771	-3.424	-12.112	-8.732	0.341
2.44097	-5.467	-1.506	-6.252	-7.181	-8.662	-6.777
2.44792	-5.143	-3.995	-6.079	-5.274	-8.612	-6.913
2.45486	-3.261	-3.727	-5.947	-5.263	-6.827	-7.047
2.46181	-3.161	-3.446	-1.529	-7.371	-6.74	-7.688
2.46875	-2.849	-3.671	-1.399	-7.354	-0.634	-3.475
2.47569	-2.666	-3.408	-2.902	-5.848	-0.517	-3.606
2.48264	-4.528	-1.479	-3.159	-2.219	-0.408	-1.482
2.48958	-4.217	-0.351	-3.076	-2.188	-0.309	-0.372
2.49653	-5.629	-0.088	-2.924	-2.15	-0.029	-0.445
2.50347	-6.789	-0.824	-2.775	-4.085	2.245	-0.508
2.51042	-6.469	-2.762	-1.803	-4.048	2.349	-0.205
2.51736	-7.087	-2.815	-3.377	-1.978	3.022	-0.249
2.52431	-2.668	-2.725	-5.177	-1.669	2.937	-0.289
2.53125	-2.378	-2.456	-5.18	-1.128	4.108	0.328
2.53819	-2.087	-0.239	-6.168	2.374	3.16	0.733
2.54514	0.177	0.023	-5.981	-0.983	4.308	0.733
2.55208	-2.653	-4.455	-4.066	3.82	5.821	3.045
2.55903	-0.16	-4.18	-0.493	3.91	5.922	3.309
2.56597	-2.018	-0.347	-3.762	3.983	6.473	3.54
2.57292	-2.084	0.956	-3.745	3.173	5.487	4.198
2.57986	-1.775	0.189	-5.118	1.241	5.619	4.093
2.58681	-2.508	-2.71	-6.634	1.286	5.726	4.207
2.59375	-2.212	-2.431	-4.97	6.178	8.371	4.121
2.60069	-1.914	-1.319	-7.063	6.189	8.463	3.495
2.60764	-2.053	-1.042	-6.146	6.27	6.863	3.372
2.61458	-1.771	0.914	-5.969	8.632	6.967	3.404
2.62153	-1.986	-1.314	-2.903	8.671	7.839	3.424
2.62847	-3.499	0.547	-2.749	9.27	8.183	7.096
2.63542	-3.195	-0.797	-3.003	8.196	8.32	2.143
2.64236	-3.018	-4.314	-4.119	8.251	8.648	2.168
2.64931	-3.446	-4.014	-2.808	8.164	6.381	2.188
2.65625	-3.153	-3.5	-3.89	7.658	8.812	1.597
2.66319	-2.861	-2.371	-3.728	7.424	6.586	0.144
2.67014	-3.661	-2.042	-4.853	7.732	9.124	-2.494
2.67708	-3.368	-1.764	-4.683	8.534	5.314	-2.526
2.68403	-3.085	-2.628	-4.529	8.62	6.996	-1.012
2.69097	-2.551	-2.368	-4.328	8.7	6.743	-0.074
2.69792	-1.983	-2.369	-4.035	4.549	7.218	-0.083
2.70486	-1.666	-1.469	-3.868	4.962	7.214	-0.321
2.71181	-4.134	-4.08	-4.049	5.006	8.216	-0.305
2.71875	-4.797	-2.856	-4.386	5.51	9.306	-0.29
2.72569	-3.523	-2.577	-5.369	7.565	9.422	1.148
2.73264	-0.818	-1.238	-5.207	8.759	10.153	3.827
2.73958	0.04	-0.527	-5.045	7.687	10.26	3.824
2.74653	0.34	-0.679	-4.719	12.447	11.626	6.052
2.75347	0.183	-1.957	-4.6	6.802	15.544	2.732
2.76042	0.483	-1.673	-4.34	6.681	11.763	6.066
2.76736	-0.096	0.884	-3.56	6.684	9.995	8.775
2.77431	-0.248	1.162	-0.735	16.873	10.092	8.785
2.78125	-0.86	0.896	-0.581	17.045	13.847	8.109
2.78819	-0.558	1.174	-3.397	17.493	17.979	3.803
2.79514	-0.258	2.66	-3.277	17.539	14.317	8.082
2.80208	1.313	2.939	2.116	17.949	14.42	10.17
2.80903	3.569	-0.046	3.102	18.028	12.261	11.279
2.81597	5.47	0.229	2.354	20.435	12.09	12.111
2.82292	6.195	3.276	3.983	20.421	12.436	12.081
2.82986	6.888	3.806	5.6	20.644	16.325	14.552
2.83681	6.776	3.82	5.711	23.198	16.399	14.543
2.84375	7.478	4.659	4.684	23.193	16.508	18.925
2.85069	4.738	4.836	2.708	20.363	17.797	18.896
2.85764	11.637	5.203	2.8	18.969	18.853	20.031
2.86458	11.937	6.31	4.706	18.924	17.963	19.995
2.87153	12.236	7.489	6.221	19.509	15.569	16.731
2.87847	12.288	8.293	9.902	22.847	15.646	14.128
2.88542	10.28	8.557	10.357	22.793	18.417	14.119
2.89236	9.695	8.238	10.465	21.513	18.522	14.109
2.89931	9.985	5.916	7.169	21.471	17.088	17.237
2.90625	13.137	6.221	6.854	17.948	17.205	16.953
2.91319	13.837	7.253	6.956	17.315	18.427	17.159
2.92014	14.411	7.946	7.058	17.307	18.546	17.773
2.92708	14.745	10.679	10.349	17.373	18.635	17.718
2.93403	12.126	10.97	10.386	19.542	20.671	17.036
2.94097	9.948	9.654	7.983	17.238	20.762	17.021
2.94792	10.248	7.232	8.023	15.775	17.348	16.915
2.95486	10.548	10.212	13.997	13.773	16.343	16.833
2.96181	10.454	8.686	14.021	15.784	13.48	15.803
2.96875	10.758	8.956	11.631	13.752	12.265	13.109
2.97569	8.687	8.606	9.314	15.677	12.375	15.672
2.98264	9.666	8.877	9.5	12.636	12.585	15.038
2.98958	8.928	6.712	7.716	12.632	12.677	14.954
2.99653	9.226	10.668	9.562	10.407	8.95	14.471
3.00347	8.503	8.34	7.45	10.388	9.049	10.482
3.01042	8.401	11.264	7.522	10.463	3.221	10.56
3.01736	8.589	8.981	7.22	10.385	1.568	7.676
3.02431	8.884	9.263	6.205	7.056	1.661	5.761
3.03125	8.997	6.328	1.699	6.993	4.967	5.614
3.03819	8.995	5.775	3.833	2.266	5.06	2.787
3.04514	8.376	5.884	1.406	0.435	-0.984	-0.023
3.05208	4.906	5.548	1.539	-1.219	-1.96	-0.123
3.05903	4.903	3.717	1.555	-5.2	-6.774	0.937
3.06597	4.294	3.976	1.929	-5.59	-6.688	0.879
3.07292	2.525	1.316	2.528	-6.656	-8.363	-1.353
3.07986	2.482	1.607	1.902	-6.85	-5.383	-5.919
3.08681	2.679	-1.418	0.646	-6.96	-8.739	-8.816
3.09375	2.976	-1.191	0.522	-7.07	-7.541	-9.912
3.10069	0.814	-0.941	0.495	-7.732	-10.577	-10.362
3.10764	3.845	-0.799	0.428	-12.229	-10.255	-10.488
3.11458	2.758	-0.542	-4.539	-11.627	-13.308	-14.334
3.12153	3.044	0.481	-4.508	-12.209	-15.726	-11.873
3.12847	1.91	0.721	-5.09	-12.319	-15.713	-17.017
3.13542	-1.047	-0.666	-5.412	-15.721	-11.176	-12.847
3.14236	-1.229	-1.457	-5.491	-16.131	-11.208	-19.228
3.14931	-3.084	-4.441	-4.178	-17.171	-15.42	-19.466
3.15625	-2.667	-4.248	-4.298	-21.017	-17.287	-19.705
3.16319	-3.243	-4.054	-7.534	-21.236	-15.637	-17.607
3.17014	-3.042	-2.341	-9.019	-20.936	-17.503	-17.783
3.17708	-2.958	-2.538	-7.839	-21.186	-16.742	-13.678
3.18403	-3.065	-2.372	-9.742	-24.627	-21.825	-14.053
3.19097	-4.384	-2.699	-9.937	-26.257	-19.193	-17.763
3.19792	-6.435	-4.67	-10.622	-25.228	-21.155	-20.864
3.20486	-6.756	-3.563	-13.398	-24.006	-21.309	-25.561
3.21181	-6.605	-4.407	-11.038	-24.347	-24.356	-25.975
3.21875	-7.837	-5.174	-9.973	-24.89	-24.55	-26.389
3.22569	-7.711	-5.207	-10.209	-30.296	-25.276	-20.448
3.23264	-7.248	-6.892	-11.152	-30.664	-24.459	-25.557
3.23958	-7.136	-7.423	-11.415	-30.89	-24.647	-22.712
3.24653	-6.678	-6.671	-11.494	-29.874	-23.75	-25.626
3.25347	-7.008	-7.562	-11.069	-29.039	-23.933	-23.584
3.26042	-6.453	-6.66	-12.096	-27.741	-26.968	-26.55
3.26736	-6.804	-7.455	-13.102	-27.806	-27.187	-19.907
3.27431	-9.304	-7.197	-13.759	-28.255	-24.468	-27.415
3.28125	-9.22	-7.089	-16.663	-29.643	-24.4	-23.411
3.28819	-9.127	-7	-16.953	-30.022	-24.594	-23.856
3.29514	-8.833	-5.874	-14.865	-30.399	-24.814	-23.578
3.30208	-10.641	-9.475	-12.111	-31.874	-23.34	-24.029
3.30903	-9.858	-8.96	-12.374	-32.249	-22.327	-24.464
3.31597	-10.42	-8.89	-12.72	-29.119	-22.567	-23.6
3.32292	-11.235	-8.821	-12.987	-25.904	-22.8	-24.039
3.32986	-11.098	-9.226	-13.669	-27.577	-23.35	-24.722
3.33681	-10.965	-9.126	-13.453	-26.654	-24.83	-25.145
3.34375	-11.81	-8.845	-11.435	-28.328	-23.781	-22.028
3.35069	-13.057	-8.752	-11.719	-28.585	-22.99	-22.197
3.35764	-12.974	-10.867	-12.654	-28.977	-23.169	-22.565
3.36458	-14.709	-12.478	-16.64	-22.195	-23.814	-21.469
3.37153	-14.563	-12.371	-13.875	-22.595	-24.081	-22.614
3.37847	-15.524	-12.269	-17.901	-24.34	-24.279	-20.371
3.38542	-12.556	-9.961	-18.792	-24.681	-24.254	-21.922
3.39236	-12.419	-9.861	-19.065	-25.062	-22.188	-22.339
3.39931	-11.234	-9.766	-13.667	-23.736	-22.431	-22.78
3.40625	-10.711	-13.302	-13.986	-28.543	-22.67	-22.137
3.41319	-10.583	-14.625	-18.163	-25.13	-22.398	-21.447
3.42014	-14.313	-13.146	-18.486	-25.546	-20.689	-15.728
3.42708	-14.162	-11.589	-15.112	-22.464	-20.933	-17.588
3.43403	-13.032	-11.45	-13.015	-17.467	-20.497	-17.984
3.44097	-12.913	-11.35	-15.742	-17.903	-18.645	-19.809
3.44792	-12.934	-11.264	-13.67	-18.809	-20.991	-20.198
3.45486	-12.845	-10.058	-19.91	-23.032	-16.777	-17.844
3.46181	-11.998	-9.952	-11.855	-21.25	-17.074	-18.277
3.46875	-11.89	-10.576	-17.412	-21.747	-16.731	-19.419
3.47569	-10.935	-11.104	-9.17	-22.275	-17.027	-19.877
3.48264	-12.448	-11.033	-15.099	-20.319	-14.971	-19.009
3.48958	-11.979	-12.183	-11.809	-20.162	-15.282	-13.65
3.49653	-12.846	-12.145	-12.938	-20.708	-14.113	-13.539
3.50347	-12.34	-12.081	-13.311	-19.179	-13.137	-14.638
3.51042	-16.26	-13.403	-19.307	-13.167	-14.789	-13.616
3.51736	-16.491	-13.333	-19.696	-13.671	-14.039	-15.438
3.52431	-16.433	-13.281	-18.156	-15.536	-14.44	-14.69
3.53125	-14.856	-13.411	-16.928	-16.704	-14.817	-14.494
3.53819	-12.83	-11.073	-15.118	-17.298	-16.931	-11.063
3.54514	-12.783	-11.283	-15.578	-17.985	-17.368	-11.69
3.55208	-12.081	-11.26	-16.306	-18.639	-14.404	-13.643
3.55903	-12.08	-11.695	-16.789	-16.51	-12.681	-17.816
3.56597	-11.168	-12.855	-14.829	-17.218	-13.155	-18.471
3.57292	-11.189	-12.874	-12.999	-17.937	-9.651	-9.756
3.57986	-13.507	-12.914	-14.704	-14.621	-10.064	-10.436
3.58681	-15.066	-7.922	-15.204	-10.844	-8.156	-10.509
3.59375	-15.083	-7.984	-15.712	-11.582	-11.197	-9.385
3.60069	-12.505	-11.274	-15.201	-10.736	-11.063	-10.149
3.60764	-12.528	-11.578	-12.304	-11.51	-11.616	-12.807
3.61458	-13.838	-11.645	-11.559	-12.359	-8.647	-13.573
3.62153	-13.845	-10.699	-12.135	-10.048	-6.63	-8.97
3.62847	-12.633	-10.197	-11.019	-8.438	-2.268	-9.829
3.63542	-12.422	-9.742	-9.519	-7.297	-1.135	-10.713
3.64236	-8.815	-6.875	-10.073	-7.768	-0.043	-6.903
3.64931	-8.699	-6.953	-6.333	0.359	7.286	-2.945
3.65625	-8.551	-7.372	-5.457	0.181	6.646	-3.812
3.66319	-7.616	-7.464	-7.47	1.814	6.031	1.705
3.67014	-5.084	-6.091	-4.931	4.354	5.908	3.991
3.67708	-5.131	-4.165	-3.146	4.514	8.343	4.571
3.68403	-3.371	-2.863	0.112	6.866	9.278	7.806
3.69097	-2.481	-1.158	-0.024	9.972	8.601	13.097
3.69792	-2.506	-0.347	0.137	10.487	7.911	12.27
3.70486	-1.036	0.658	-0.491	9.552	13.224	11.707
3.71181	1.077	1.037	1.43	10.045	14.135	12.261
3.71875	1.01	0.468	1.628	12.433	13.418	11.362
3.72569	0.92	0.857	2.151	11.996	12.546	10.432
3.73264	2.925	1.971	2.483	13.506	11.87	16.024
3.73958	6.106	2.297	3.654	15.85	15.475	17.018
3.74653	6.334	3.926	3.018	14.848	14.776	16.139
3.75347	6.276	2.263	5.595	11.531	13.518	15.212
3.76042	6.233	7.077	10.022	10.549	12.785	22.834
3.76736	8.768	3.215	10.908	13.416	13.103	12.725
3.77431	8.721	6.872	10.429	18.31	12.934	17.134
3.78125	8.694	3.45	9.669	19.777	14.791	13.307
3.78819	6.389	5.701	6.865	16.381	14.157	15.376
3.79514	6.319	4.179	6.226	15.686	13.788	11.568
3.80208	6.271	5.397	5.598	13.366	12.812	14.414
3.80903	5.887	5.307	3.53	13.746	12.523	13.604
3.81597	5.845	6.145	2.936	14.631	10.142	12.793
3.82292	5.804	6.074	2.979	14.252	11.241	14.486
3.82986	4.882	4.632	3.502	13.323	11.095	13.675
3.83681	5.948	4.566	3.469	12.389	10.463	12.864
3.84375	9.791	5.067	2.883	14.365	6.731	13.316
3.85069	10.107	5.804	4.963	13.424	6.116	10.201
3.85764	10.06	4.95	4.417	11.817	9.63	7.212
3.86458	9.381	6.168	1.191	10.597	9.103	6.429
3.87153	7.439	4.268	0.608	9.676	8.469	8.065
3.87847	7.409	5.868	6.053	8.803	10.788	7.301
3.88542	6.08	5.804	6.747	3.325	7.786	6.474
3.89236	6.093	6.54	4.853	8.417	9.408	5.742
3.89931	9.576	6.491	6.953	6.465	8.094	8.593
3.90625	9.605	6.681	6.948	5.611	7.494	7.857
3.91319	9.552	6.367	6.605	4.727	6.898	6.337
3.92014	6.874	6.926	6.031	4.462	8.273	5.606
3.92708	6.866	4.265	5.688	4.583	9.033	4.915
3.93403	8.511	9.351	7.014	5.322	7.181	2.349
3.94097	8.56	6.474	6.466	7.092	7.949	-0.047
3.94792	12.28	6.884	7.194	7.768	8.019	-0.765
3.95486	10.604	6.43	5.314	5.478	7.507	2.579
3.96181	10.623	3.96	7.186	6.54	7.585	4.105
3.96875	7.522	3.954	9.476	9.067	4.998	3.41
3.97569	7.55	6.646	10.139	10.741	7.478	2.741
3.98264	6.823	6.64	8.358	9.89	6.328	-0.185
3.98958	7.749	6.641	9.023	10.687	5.842	1.309
3.99653	8.844	8.972	8.604	9.858	2.352	7.805
4.00347	9.526	8.976	8.619	8.962	1.877	7.139
4.01042	10.845	8.617	8.078	5.705	5.597	7.488
4.01736	9.597	8.051	7.531	-0.964	5.103	5.775
4.02431	10.865	8.043	6.929	3.966	4.608	6.793
4.03125	13.062	7.727	11.126	3.178	5.916	6.109
4.03819	13.121	7.725	10.537	6.542	5.817	9.251
4.04514	12.043	6.133	11.548	6.755	5.281	10.953
4.05208	12.08	7.947	12.081	7.01	6.947	7.939
4.05903	14.096	10.279	11.472	6.238	9.049	9.627
4.06597	14.148	11.432	14.019	7.589	9.55	11.433
4.07292	16.202	11.523	14.538	8.069	14.346	12.219
4.07986	15.19	11.535	13.935	7.968	13.772	11.53
4.08681	15.256	11.429	11.78	6.593	13.317	11.027
4.09375	13.293	11.475	11.168	7.029	8.601	10.011
4.10069	12.342	11.832	10.232	6.204	8.128	13.391
4.10764	11.853	11.854	10.359	10.036	7.63	9.755
4.11458	11.922	12.203	9.745	15.626	12.141	11.994
4.12153	11.205	12.213	13.54	14.769	13.045	12.698
4.12847	13.582	12.274	13.122	12.303	12.606	23.034
4.13542	13.481	12.295	14.099	10.195	12.095	20.898
4.14236	14.246	12.41	11.863	10.736	10.962	20.207
4.14931	17.128	12.041	10.799	8.304	10.567	15.325
4.15625	17.222	10.98	9.987	13.434	8.25	14.664
4.16319	11.759	11.037	9.597	6.676	11.728	19.08
4.17014	10.466	13.198	8.106	11.878	16.159	20.978
4.17708	10.128	15.842	7.501	4.766	15.766	17.854
4.18403	10.249	13.334	6.908	6.901	12.485	15.637
4.19097	13.37	10.667	8.587	6.123	12.069	9.359
4.19792	13.512	10.768	7.994	6.847	11.937	8.783
4.20486	11.234	11.474	9.227	7.446	11.592	10.338
4.21181	11.39	11.581	10.237	11.516	12.06	10.734
4.21875	9.129	10.727	9.663	10.751	10.583	10.487
4.22569	11.152	8.444	7.538	7.211	5.916	14.365
4.23264	9.472	7.45	6.949	6.407	5.569	13.756
4.23958	8.262	7.558	7.944	7.537	9.58	10.915
4.24653	7.731	7.671	7.358	9.025	11.22	10.322
4.25347	7.937	4.563	5.068	7.911	10.863	14.098
4.26042	5.605	8.514	3.016	7.093	7.57	13.502
4.26736	5.804	6.062	3.919	3.743	7.213	7.371
4.27431	6.607	6.204	1.881	2.915	8.146	4.593
4.28125	8.811	6.374	1.588	3.597	7.756	6.145
4.28819	9.023	5.476	0.986	2.83	5.39	7.226
4.29514	7.844	5.048	0.343	1.955	3.095	6.599
4.30208	5.131	5.17	0.356	1.142	1.285	3.195
4.30903	3.983	5.293	-1.577	-0.106	0.681	-2.509
4.31597	3.417	5.702	-2.661	-0.003	0.391	-3.192
4.32292	2.811	3.134	-3.397	-0.873	-0.27	-2.565
4.32986	0.901	2.156	-4.077	-1.804	-3.625	-3.249
4.33681	1.061	2.28	-4.803	-3.515	-4.127	-4.146
4.34375	1.422	2.404	-6.948	-4.491	-4.662	-5.895
4.35069	1.598	2.291	-7.729	-4.274	-3.047	-6.648
4.35764	1.228	0.989	-11.986	-2.378	-5.736	-10.282
4.36458	-1.189	-0.164	-11.632	-1.973	-4.138	-7.56
4.37153	-2.812	-1.265	-12.462	-2.98	-6.883	-12.003
4.37847	-2.696	0.042	-10.546	-11.048	-7.891	-11.476
4.38542	-5.159	-0.999	-11.343	-12.137	-11.106	-14.012
4.39236	-6.947	-0.004	-14.903	-11.932	-11.704	-16.573
4.39931	-8.129	-0.785	-15.76	-13.012	-9.401	-17.541
4.40625	-8.12	-1.903	-16.625	-17.829	-10.005	-17.83
4.41319	-8.006	-3.364	-18.357	-18.977	-16.238	-17.41
4.42014	-5.885	-4.461	-19.255	-20.733	-16.855	-18.384
4.42708	-5.79	-3.19	-23.572	-20.359	-16.048	-18.882
4.43403	-9.958	-6.343	-18.679	-21.575	-16.719	-23.87
4.44097	-12.84	-6.278	-19.612	-21.395	-17.405	-20.953
4.44792	-12.731	-6.204	-20.558	-22.595	-18.897	-21.094
4.45486	-12.589	-6.12	-20.205	-25.856	-18.508	-20.238
4.46181	-8.228	-7.031	-20.385	-27.443	-19.222	-21.327
4.46875	-8.126	-7.253	-21.089	-28.688	-18.352	-24.947
4.47569	-8.573	-7.328	-21.616	-23.908	-19.071	-26.112
4.48264	-11.183	-8.417	-22.234	-25.179	-23.198	-24.23
4.48958	-12.186	-9.534	-20.956	-26.477	-23.986	-25.436
4.49653	-13.178	-9.486	-24.255	-27.707	-23.519	-24.839
4.50347	-14.9	-10.914	-26.455	-19.435	-21.821	-28.13
4.51042	-13.016	-9.227	-27.509	-20.75	-22.621	-27.209
4.51736	-10.569	-10.549	-27.058	-30.657	-23.422	-27.184
4.52431	-10.493	-10.495	-26.514	-32.087	-20.778	-28.402
4.53125	-15.883	-11.461	-25.811	-33.163	-20.994	-29.351
4.53819	-16.06	-11.402	-26.875	-26.421	-21.855	-30.594
4.54514	-15.978	-9.943	-26.745	-33.867	-25.058	-31.855
4.55208	-10.731	-9.614	-24.281	-31.467	-25.904	-31.722
4.55903	-10.634	-9.532	-25.261	-32.866	-24.355	-33.61
4.56597	-12.066	-10.431	-26.488	-32.937	-25.184	-34.297
4.57292	-12.627	-13.364	-25.501	-33.709	-25.976	-33.272
4.57986	-14.917	-12.472	-24.478	-27.698	-25.935	-28.237
4.58681	-15.161	-13.215	-25.583	-27.556	-26.372	-28.574
4.59375	-15.042	-12.308	-26.727	-29.011	-26.816	-29.468
4.60069	-15.523	-11.948	-22.228	-31.286	-24.287	-30.604
4.60764	-15.446	-11.858	-23.391	-32.772	-23.583	-31.911
4.61458	-14.079	-11.769	-25.508	-30.501	-18.779	-30.309
4.62153	-13.999	-10.129	-26.667	-29.357	-18.008	-30.772
4.62847	-14.845	-10.044	-21.814	-30.79	-18.875	-31.331
4.63542	-14.869	-10.001	-22.95	-36.305	-20.704	-32.297
4.64236	-14.761	-10.916	-23.579	-37.797	-21.582	-33.565
4.64931	-13.18	-11.849	-24.608	-30.781	-21.636	-34.851
4.65625	-13.044	-11.747	-22.674	-25.635	-22.542	-31
4.66319	-11.752	-11.653	-26.985	-27.076	-23.423	-32.339
4.67014	-14.856	-12.47	-25.073	-35.766	-21.673	-33.615
4.67708	-11.452	-9.733	-24.802	-37.235	-17.637	-32.902
4.68403	-12.83	-11.2	-25.365	-29.923	-18.499	-33.102
4.69097	-12.758	-9.657	-24.511	-27.699	-19.235	-31.362
4.69792	-12.796	-10.895	-23.521	-28.728	-24.431	-30.008
4.70486	-12.692	-9.468	-24.199	-27.755	-21.223	-31.38
4.71181	-13.162	-9.417	-25.993	-28.266	-24.445	-32.738
4.71875	-12.574	-6.591	-26.648	-28.789	-25.377	-31.859
4.72569	-13.484	-7.364	-24.657	-29.584	-26.347	-31.816
4.73264	-12.392	-7.265	-24.854	-22.524	-24.197	-30.272
4.73958	-15.566	-7.656	-24.095	-23.8	-24.277	-31.714
4.74653	-10.027	-7.687	-25.147	-25.368	-23.976	-26.935
4.75347	-12.044	-7.596	-25.598	-26.918	-24.901	-27.96
4.76042	-10.832	-10.066	-25.491	-23.055	-24.863	-29.284
4.76736	-10.772	-9.954	-23.228	-19.419	-16.864	-30.608
4.77431	-10.18	-10.254	-23.458	-21.046	-18.953	-28.997
4.78125	-7.175	-10.619	-21.306	-23.359	-18.083	-27.363
4.78819	-9.942	-10.54	-20.979	-24.997	-18.649	-28.703
4.79514	-9.868	-9.425	-18.485	-25.469	-19.427	-27.122
4.80208	-9.808	-5.957	-18.072	-23.732	-18.131	-23.247
4.80903	-9.381	-4.543	-19.301	-21.539	-13.135	-22.595
4.81597	-8.265	-4.465	-15.396	-16.951	-11.973	-22.786
4.82292	-8.23	-3.249	-11.939	-18.618	-9.902	-22.156
4.82986	-8.206	-5.888	-13.302	-10.848	-10.024	-23.112
4.83681	-5.6	-4.945	-14.321	-9.407	-9.514	-23.034
4.84375	-3.8	-4.885	-15.693	-7.703	-8.742	-16.177
4.85069	-2.849	-2.257	-11.112	-9.819	-9.815	-16.615
4.85764	-2.827	-2.117	-12.228	-11.114	-3.186	-13.295
4.86458	-1.027	-1.671	-5.621	-8.353	-3.817	-14.589
4.87153	3.754	-0.703	-5.921	-8.06	-3.717	-4.555
4.87847	3.763	-0.608	-7.353	-0.243	-1.364	-4.68
4.88542	3.887	0.586	-7.478	0.358	-1.04	-1.597
4.89236	5.243	-0.526	-0.066	-2.225	-2.17	-2.148
4.89931	5.407	0.673	-1.754	-3.283	-3.293	0.896
4.90625	5.347	2.159	0.642	-1.936	-0.653	0.464
4.91319	6.032	3.773	0.471	1.874	-1.768	-1.245
4.92014	5.977	3.8	3.136	5.952	-0.616	-0.645
4.92708	5.937	3.802	1.947	5.956	3.667	-2.382
4.93403	5.465	5.674	7.987	7.56	5.935	-0.876
4.94097	5.396	5.666	7.535	2.387	6.38	6.821
4.94792	5.314	5.657	5.949	5.465	8.924	10.628
4.95486	4.77	4.606	7.559	8.341	7.457	7.788
4.96181	4.69	7.154	6.784	9.877	6.455	5.986
4.96875	8.205	6.215	10.379	7.812	6.599	4.145
4.97569	8.138	9.984	10.957	10.229	14.553	15.378
4.98264	8.045	7.629	10.087	13.225	13.224	13.85
4.98958	7.355	11.516	8.391	15.002	14.503	15.34
4.99653	9.008	9.404	12.421	12.865	13.502	13.628
5.00347	8.878	9.346	11.715	11.276	12.149	15.682
5.01042	8.73	9.266	13.719	12.588	10.855	18.223
5.01736	9.519	9.376	13.448	18.761	13.217	18.591
5.02431	9.569	9.567	14.381	16.477	17.388	16.507
5.03125	13.966	9.46	12.848	12.197	17.505	17.86
5.03819	13.766	8.377	12.515	9.834	16.995	17.483
5.04514	11.681	6.522	13.393	14.108	14.444	21.803
5.05208	8.517	6.396	13.246	11.857	13.875	20.255
5.05903	7.82	4.878	13.204	12.246	12.383	19.931
5.06597	7.629	11.36	15.385	10.619	10.752	22.331
5.07292	7.423	8.894	15.722	8.378	9.067	19.955
5.07986	6.834	9.379	13.71	5.479	10.62	21.163
5.08681	6.589	8.556	11.671	7.649	10.43	13.005
5.09375	6.555	6.682	13.767	11.22	10.863	19.055
5.10069	12.515	6.469	14.239	14.275	9.394	15.581
5.10764	9.026	6.302	12.154	11.576	7.966	17.39
5.11458	8.734	6.091	10.027	8.795	8.124	15.042
5.12153	7.305	5.856	7.996	4.73	9.465	12.466
5.12847	4.492	6.515	9.528	6.522	8.442	10.782
5.13542	6.693	6.268	4.899	2.495	6.541	11.317
5.14236	3.859	5.288	5.07	6.268	5.206	9.639
5.14931	3.439	4.697	3.682	2.77	4.727	9.455
5.15625	2.468	2.874	4.258	-0.199	3.122	10.082
5.16319	2.796	2.603	3.77	-4.386	1.123	7.316
5.17014	2.141	2.891	2.888	-7.422	0.63	0.517
5.17708	3.473	2.598	0.978	-6.353	-3.665	-2.302
5.18403	3.132	1.016	-1.406	-4.358	-2.607	-2.84
5.19097	2.765	0.64	0.832	-7.516	-4.661	-3.374
5.19792	0.603	0.39	-3.69	-10.611	-5.993	-4.505
5.20486	0.23	0.009	-2.104	-13.813	-2.137	-7.155
5.21181	-2.428	-0.365	-4.675	-11.023	-4.333	-10.151
5.21875	-2.5	-0.706	-7.149	-9.172	-5.239	-10.837
5.22569	-2.915	-3.585	-9.71	-15.438	-7.233	-13.852
5.23264	-3.337	-4.654	-11.497	-12.651	-9.401	-15.57
5.23958	-4.543	-4.279	-13.329	-17.843	-11.676	-18.89
5.24653	-5.249	-5.262	-11.868	-21.216	-14.595	-20.636
5.25347	-5.674	-5.603	-14.492	-25.07	-16.953	-25.137
5.26042	-6.241	-8.028	-13.985	-28.557	-20.769	-28.68
5.26736	-6.668	-8.894	-11.875	-29.643	-16.958	-31.839
5.27431	-7.112	-8.783	-14.453	-27.187	-21.322	-35.023
5.28125	-7.101	-7.413	-17.157	-30.278	-20.725	-24.991
5.28819	-7.695	-7.812	-19.193	-31.204	-23.905	-36.502
5.29514	-7.996	-9.76	-24.733	-34.801	-26.35	-30.308
5.30208	-7.597	-10.164	-20.78	-34.383	-28.783	-32.987
5.30903	-8.074	-10.545	-23.56	-37.334	-29.555	-36.234
5.31597	-9.891	-10.961	-26.387	-40.982	-31.927	-32.299
5.32292	-10.34	-11.338	-30.308	-44.693	-34.115	-35.923
5.32986	-10.186	-11.707	-33.089	-48.328	-34.597	-39.206
5.33681	-10.636	-12.541	-35.508	-50.707	-32.298	-42.486
5.34375	-13.936	-13.351	-37.38	-51.543	-34.733	-41.155
5.35069	-14.349	-14.652	-32.708	-53.759	-38.855	-44.411
5.35764	-13.481	-17.595	-35.55	-57.487	-41.315	-48.845
5.36458	-13.888	-17.98	-41.078	-59.88	-43.776	-52.118
5.37153	-15.92	-16.21	-44.627	-56.353	-44.203	-49.779
5.37847	-17.623	-16.245	-46.782	-59.607	-46.714	-52.679
5.38542	-17.996	-16.409	-43.982	-63.308	-46.714	-55.908
5.39236	-18.369	-16.794	-45.95	-60.947	-47.362	-56.317
5.39931	-20.743	-18.123	-47.583	-64.712	-45.68	-57.839
5.40625	-14.69	-18.871	-47.673	-68.47	-48.187	-56.784
5.41319	-19.222	-19.24	-49.245	-67.535	-53.552	-59.652
5.42014	-16.438	-19.597	-53.493	-65.85	-56.043	-61.122
5.42708	-16.935	-17.513	-55.101	-68.383	-58.052	-60.731
5.43403	-17.168	-17.856	-55.348	-70.322	-59.5	-58.949
5.44097	-17.667	-18.728	-50.162	-67.613	-56.411	-60.115
5.44792	-19.216	-19.08	-51.856	-67.252	-55.772	-59.722
5.45486	-19.587	-17.34	-51.678	-70.17	-57.266	-66.581
5.46181	-20.241	-17.697	-52.24	-71.531	-55.329	-64.139
5.46875	-20.586	-18.013	-49.389	-69.985	-52.177	-61.737
5.47569	-18.57	-18.97	-48.092	-71.738	-53.383	-64.045
5.48264	-15.418	-19.327	-47.897	-70.08	-55.081	-65.304
5.48958	-15.398	-19.842	-50.208	-65.88	-54.577	-67.365
5.49653	-14.818	-20.152	-49.536	-68.558	-53.436	-61.583
5.50347	-16.043	-18.206	-50.171	-70.386	-50.654	-57.001
5.51042	-15.447	-16.792	-53.144	-56.677	-48.854	-57.925
5.51736	-18.679	-16.166	-43.506	-60.406	-46.219	-45.727
5.52431	-12.799	-12.58	-44.713	-61.097	-47.423	-48.218
5.53125	-11.863	-13.719	-40.398	-60.697	-39.322	-41.444
5.53819	-10.392	-13.22	-40.368	-56.834	-37.854	-43.198
5.54514	-12.338	-11.732	-39.342	-50.682	-37.973	-44.45
5.55208	-11.721	-11.416	-37.063	-49.394	-35.496	-42.129
5.55903	-12.016	-11.727	-36.433	-49.017	-31.505	-27.587
5.56597	-7.806	-12.047	-32.506	-37.471	-26.222	-26.442
5.57292	-7.542	-9.11	-31.894	-40.492	-28.687	-25.618
5.57986	-7.018	-11.648	-32.178	-39.805	-23.801	-21.064
5.58681	-5.642	-7.917	-28.937	-35.912	-18.416	-20.033
5.59375	-7.584	-7.196	-29.706	-34.83	-18.167	-20.398
5.60069	-4.345	-3.838	-26.19	-28.995	-11.382	-16.537
5.60764	-1.197	-4.141	-25.395	-29.633	-10.724	-9.273
5.61458	-0.624	-4.443	-22.374	-21.394	-10.031	-7.911
5.62153	0.835	-1.27	-24.628	-16.788	-9.591	-4.809
5.62847	1.148	1.688	-18.032	-18.738	-4.249	-7.112
5.63542	2.095	1.478	-16.904	-12.284	-3.087	6.19
5.64236	2.696	1.184	-8.808	-13.793	-1.992	3.672
5.64931	2.456	1.872	-11.094	-17.419	0.572	8.916
5.65625	2.216	2.114	-9.582	-5.579	0.936	7.12
5.66319	5.329	1.66	-11.428	3.08	3.574	11.75
5.67014	7.138	3.734	-10.362	3.243	7.485	12.635
5.67708	7.28	3.456	-11.135	1.309	5.724	13.434
5.68403	7.117	5.298	-4.69	13.893	6.686	14.797
5.69097	9.16	7.182	-2.811	11.604	9.745	16.422
5.69792	8.94	7.655	-5.8	7.896	17.312	23.84
5.70486	9.513	7.357	3.369	14.802	17.279	27.309
5.71181	9.286	7.269	1.3	21.51	17.347	32.785
5.71875	14.974	10.331	-1.724	21.926	16.594	30.654
5.72569	14.734	10.832	8.283	23.631	17.723	31.644
5.73264	14.636	13.272	5.942	24.312	23.06	37.123
5.73958	14.394	12.963	8.514	26.209	33.481	38.807
5.74653	17.627	12.67	11.859	31.944	31.447	44.743
5.75347	17.375	10.944	11.605	31.351	30.873	43.347
5.76042	16.576	12.849	13.932	41.259	35.429	41.195
5.76736	16.345	13.074	16.612	48.656	34.084	44.976
5.77431	18.642	12.765	13.636	44.947	34.866	45.573
5.78125	19.839	14.741	17.779	45.79	36.823	51.404
5.79514	20.109	14.431	17.549	52.371	40.414	49.148
5.80208	20.987	15.83	24.509	48.759	38.554	46.242
5.80903	22.626	15.517	23.968	51.367	38.762	50.952
5.81597	22.793	15.203	26.934	50.536	43.275	53.931
5.82292	22.211	15.193	30.954	53.619	41.958	50.949
5.82986	19.885	15.391	28.266	52.315	39.703	48.017
5.83681	19.683	15.095	27.837	50.666	41.208	56.036
5.84375	19.581	17.058	30.914	55.349	39.828	53.297
5.85069	19.383	18.576	36.754	53.964	48.617	51.807
5.85764	18.174	18.275	33.544	60.12	46.168	54.14
5.86458	17.956	17.098	30.386	64.923	44.354	52.307
5.87153	17.877	16.778	31.605	63.837	41.904	56.656
5.87847	17.692	16.702	34.389	60.146	51.11	53.673
5.88542	22.361	18.681	31.175	56.606	48.641	53.399
5.89236	18.923	18.397	27.899	62.704	46.204	54.856
5.89931	18.71	17.972	36.678	69.714	41.396	59.941
5.90625	18.496	16.162	35.574	66.274	46.224	60.983
5.91319	19.044	15.881	34.609	62.422	41.563	58.016
5.92014	18.894	16.235	34.603	66.723	41.315	59.326
5.92708	22.247	15.946	39.189	64.02	47.302	56.36
5.93403	17.665	13.503	38.835	61.671	50.119	57.312
5.94097	19.985	13.252	36.769	67.328	47.657	61.037
5.94792	17.338	16.185	35.66	61.874	45.35	62.082
5.95486	18.92	15.931	31.615	60	42.913	59.176
5.96181	14.548	15.381	35.214	64.333	40.483	55.357
5.96875	15.321	15.144	31.932	62.463	42.651	52.436
5.97569	14.192	11.586	30.802	59.708	35.223	55.186
5.98264	12.474	15.249	32.654	57.396	37.89	52.38
5.98958	12.338	19.713	30.727	55.078	35.404	49.975
5.99653	14.333	19.451	38.384	56.518	38.841	47.095
6.00347	14.21	13.977	37.465	58.678	36.483	45.403
6.01042	13.996	11.689	38.398	53.189	35.919	43.886
6.01736	13.465	11.456	35.073	51.43	33.556	39.753
6.02431	13.333	11.022	31.745	48.086	29.085	31.533
6.03125	11.661	12.803	28.509	58.129	26.72	28.774
6.03819	8.018	12.902	28.601	54.535	28.982	33.187
6.04514	7.73	12.72	34.299	50.946	26.703	33.214
6.05208	7.668	9.639	30.954	46.533	28.029	33.416
6.05903	10.965	9.159	22.59	51.03	27.102	35.664
6.06597	10.897	8.117	19.288	47.279	24.926	32.261
6.07292	11.209	8.002	21.647	45.911	25.62	30.359
6.07986	10.47	6.532	19.965	42.464	23.025	31.587
6.08681	10.443	6.516	20.141	38.97	20.826	31.578
6.09375	10.411	5.992	16.872	36.806	17.925	28.979
6.10069	6.012	6.198	13.609	33.303	15.733	21.993
6.10764	3.846	5.69	10.637	29.794	13.59	19.426
6.11458	3.867	7.117	7.714	21.058	16.354	16.949
6.12153	5.975	7.007	6.127	17.634	18.608	14.432
6.12847	6.022	6.955	10.507	20.283	16.487	11.945
6.13542	6.065	6.851	8.027	25.053	12.968	16.005
6.14236	3.109	6.778	11.984	21.67	8.655	15.746
6.14931	3.163	6.234	10.443	18.397	6.504	15.51
6.15625	1.813	2.83	7.242	22.336	7.725	13.088
6.16319	1.901	2.248	3.997	18.907	7.962	11.639
6.17014	0.449	1.797	2.375	14.307	8.276	9.624
6.17708	0.562	1.724	-0.255	11.07	6.579	13.061
6.18403	0.674	1.666	3.042	7.805	6.443	10.769
6.19097	0.789	1.801	0.244	0.727	4.334	10.195
6.19792	1.881	1.75	-2.966	-2.552	-0.47	7.881
6.20486	0.921	1.714	-3.175	6.285	-2.507	6.432
6.21181	1.071	2.97	-3.078	2.902	-1.05	4.178
6.21875	0.619	-0.234	-7.001	-4.99	-3.112	2.714
6.22569	0.765	1.232	-8.098	-8.255	-5.174	3.967
6.23264	0.952	1.172	-4.781	-5.948	-6.896	2
6.23958	1.138	1.203	-0.819	-7.185	-8.93	-0.524
6.24653	3.603	1.148	-4.039	-9.999	-9.261	-2.507
6.25347	1.008	-0.487	-9.884	-12.724	-10.471	-2.756
6.26042	2.312	-1.519	-13.506	-14.269	-6.11	-4.94
6.26736	-0.73	-1.182	-16.783	-17.568	-4.261	-7.125
6.27431	-0.544	-1.184	-17.382	-16.857	-6.283	-8.077
6.28125	-3.26	-1.181	-15.753	-15.2	-13.656	-10.269
6.28819	-3.054	1.058	-16.489	-18.512	-15.713	-3.329
6.29514	0.313	1.057	-15.087	-26.676	-12.601	-5.53
6.30208	0.544	1.042	-16.265	-29.887	-14.748	-7.786
6.30903	-1.392	0.019	-10.642	-22.56	-15.759	-12.088
6.31597	-1.548	0.009	-17.966	-25.869	-15.818	-17.05
6.32292	-0.926	-6.505	-16.972	-29.307	-16.162	-19.35
6.32986	-1.082	-1.829	-24.623	-29.769	-20.158	-21.681
6.33681	-2.755	-2.594	-16.128	-33.217	-23.908	-27.483
6.34375	-3.926	-2.603	-27.686	-36.564	-26.159	-29.852
6.35069	-2.374	-2.621	-21.608	-38.423	-22.983	-30.013
6.35764	-2.129	-2.656	-25.086	-41.987	-25.247	-32.422
6.36458	-1.957	-2.661	-28.452	-40.128	-27.498	-28.411
6.37153	-4.464	-3.425	-29.955	-41.618	-27.188	-30.887
6.37847	-5.017	-3.465	-32.616	-45.243	-27.426	-28.244
6.38542	-4.107	-3.503	-34.332	-48.955	-31.882	-26.348
6.39236	-4.623	-6.249	-28.333	-48.218	-32.168	-29.495
6.39931	-3.345	-6.512	-32.003	-49.249	-34.376	-31.405
6.40625	-3.167	-6.567	-35.609	-52.933	-32.011	-30.03
6.41319	-2.999	-7.498	-35.586	-56.445	-34.56	-32.571
6.42014	-7.52	-7.556	-39.206	-64.715	-35.799	-32.575
6.42708	-7.354	-6.904	-42.902	-58.745	-42.641	-33.069
6.43403	-7.004	-6.958	-38.543	-60.459	-40.786	-35.639
6.44097	-6.078	-10.088	-41.368	-55.897	-47.732	-49.197
6.44792	-6.102	-10.183	-45.052	-57.596	-40.715	-51.79
6.45486	-4.965	-10.256	-44.351	-54.37	-43.243	-39.638
6.46181	-5.215	-10.66	-47.044	-64.568	-45.833	-39.855
6.46875	-4.599	-10.73	-40.909	-60.331	-46.697	-42.463
6.47569	-4.872	-8.424	-40.182	-66.635	-45.639	-45.07
6.48264	-8.356	-8.032	-45.259	-60.97	-48.037	-53.122
6.48958	-8.184	-8.093	-42.886	-64.197	-48.435	-48.437
6.49653	-6.642	-8.098	-43.739	-62.109	-50.822	-44.837
6.50347	-5.844	-9.189	-46.608	-64.613	-45.745	-45.653
6.51042	-6.258	-9.577	-46.922	-68.634	-45.801	-44.158
6.51736	-5.141	-10.24	-45.947	-65.852	-41.925	-46.768
6.52431	-2.993	-10.697	-41.787	-68.296	-44.572	-42.17
6.53125	-2.789	-12.483	-46.471	-60.027	-47.218	-40.153
6.53819	-6.851	-12.53	-41.314	-63.951	-47.852	-36.754
6.54514	-6.67	-12.143	-42.465	-64.52	-50.04	-39.205
6.55208	-6.269	-10.889	-30.032	-68.467	-48.116	-41.132
6.55903	-5.384	-10.937	-30.763	-62.854	-44.517	-42.053
6.56597	-5.832	-11.387	-34.621	-66.204	-46.765	-40.553
6.57292	-8.623	-11.435	-38.483	-65.342	-43.656	-43.015
6.57986	-8.393	-10.927	-41.07	-62.912	-46.014	-45.426
6.58681	-5.942	-10.956	-40.137	-59.373	-48.615	-31.056
6.59375	-4.293	-10.988	-38.103	-62.285	-41.887	-33.48
6.60069	-5.453	-8.255	-36.744	-54.064	-42.303	-35.092
6.60764	-6.991	-8.281	-37.354	-52.274	-43.919	-36.3
6.61458	-7.713	-10.141	-34.237	-59.449	-41.601	-38.615
6.62153	-6.495	-10.145	-29.948	-59.992	-44.144	-31.165
6.62847	-6.8	-7.453	-32.893	-60.438	-29.991	-33.509
6.63542	-4.1	-7.43	-35.026	-59.285	-32.561	-33.524
6.64236	-3.829	-8.726	-35.429	-56.304	-32.796	-32.714
6.64931	-3.551	-9.6	-32.114	-65.971	-40.022	-36.324
6.65625	-6.959	-8.692	-32.847	-56.02	-30.44	-28.368
6.66319	-7.058	-8.755	-29.516	-49.26	-32.963	-28.017
6.67014	-6.398	-8.486	-33.357	-53.18	-35.052	-30.185
6.67708	-4.593	-7.138	-26.571	-57.146	-32.286	-30.209
6.68403	-4.304	-7.109	-29.474	-53.067	-30.599	-34.863
6.69097	-4.016	-5.791	-30.833	-43.92	-32.457	-32.474
6.69792	-5.809	-5.758	-32.702	-40.875	-30.395	-27.605
6.70486	-5.573	-5.711	-25.857	-42.801	-24.969	-29.692
6.71181	-5.93	-6.418	-28.252	-32.515	-27.084	-25.336
6.71875	-4.947	-6.359	-28.61	-35.636	-27.853	-22.885
6.72569	-3.796	-5.966	-28.623	-36.685	-24.137	-23.122
6.73264	-3.459	-3.905	-30.785	-39.269	-25.488	-19.621
6.73958	-3.122	-3.833	-22.616	-41.757	-21.915	-11.766
6.74653	-1.764	-1.103	-26.368	-35.519	-18.766	-8.574
6.75347	-0.112	-3.021	-27.24	-33.265	-14.35	-9.416
6.76042	1.11	-0.793	-26.415	-24.359	-14.086	-7.042
6.76736	1.465	-2.862	-14.655	-23.64	-16.511	-7.151
6.77431	1.814	-1.483	-18.015	-20.583	-12.839	-1.716
6.78125	2.163	-1.388	-12.061	-21.435	-8.71	-2.239
6.78819	2.183	1.389	-15.285	-8.717	-4.645	6.128
6.79514	0.802	1.503	-17.824	-12.595	5.928	8.038
6.80208	1.186	3.845	-11.193	-16.505	3.903	14.996
6.80903	2.891	3.783	-12.188	-5.055	5.79	16.189
6.81597	4.722	5.11	-1.825	-3.842	12.378	22.161
6.82292	5.054	4.746	4.222	13.912	10.768	29.766
6.82986	5.521	5.029	3.747	20.546	18.225	32.353
6.83681	7.196	5.158	13.674	16.797	22.382	34.167
6.84375	9.728	6.236	13.604	23.045	27.25	45.242
6.85069	11.128	9.822	16.817	24.162	30.586	44.163
6.85764	11.534	9.973	14.749	34.69	35.246	49.025
6.86458	13.246	10.123	26.253	35.104	38.507	60.915
6.87153	11.487	11.052	30.721	38.126	45.002	61.592
6.87847	14.032	14.514	31.191	52.836	48.056	66.487
6.88542	12.535	14.668	39.916	61.692	47.234	64.809
6.89236	14.407	16.221	38.597	58.324	47.959	66.08
6.89931	14.81	18.562	45.983	69.906	59.922	85.099
6.90625	16.556	19.726	44.685	66.654	67.665	86.053
6.91319	18.33	19.856	46.077	80.55	66.906	87.673
6.92014	20.151	18.948	43.632	76.809	64.643	88.197
6.92708	20.351	16.997	54.093	77.11	70.01	86.581
6.93403	20.755	19.269	50.597	81.309	69.899	91.243
6.94097	16.878	19.584	55.936	92.699	68.069	103.426
6.94792	17.031	23.41	52.891	92.774	66.874	101.753
6.95486	17.444	23.553	58.947	103.57	73.544	102.872
6.96181	18.602	22.949	55.93	99.781	71.668	103.66
6.96875	19.028	23.088	53.364	93.758	74.822	102.149
6.97569	19.42	23.813	49.528	89.933	77.262	100.511
6.98264	18.004	23.969	51.059	101.476	75.988	106.89
6.98958	18.161	22.772	48.561	103.964	73.762	106.67
6.99653	18.52	19.715	51.661	100.609	81.104	104.933
7.00347	17.581	23.048	47.906	98.452	78.646	102.762
7.01042	19.335	19.885	57.704	101.219	84.829	101.062
7.01736	19.595	22.158	56.72	97.088	69.858	99.376
7.02431	19.994	22.282	53.049	92.183	67.418	92.282
7.03125	17.643	22.401	55.931	87.967	64.857	90.501
7.03819	17.019	20.971	54.987	84.483	63.31	92.041
7.04514	16.666	19.179	52.609	82.67	60.679	90.199
7.05208	14.641	18.7	51.377	79.279	57.933	83.155
7.05903	15.012	18.761	51.159	86.217	55.237	77.103
7.06597	12.151	17.995	53.522	81.916	60.251	75.147
7.07292	12.52	17.515	50.293	79.696	57.5	73.206
7.07986	14.894	14.722	53.309	75.259	51.649	64.607
7.08681	15.235	13.738	50.795	72.581	48.016	62.542
7.09375	12.972	14.28	45.36	73.535	46.092	68.882
7.10069	12.845	13.847	44.412	68.991	43.421	66.916
7.10764	13.183	13.619	44.893	62.294	40.577	64.799
7.11458	7.051	12.418	43.783	56.904	37.756	50.145
7.12153	6.769	11.647	39.734	52.286	37.478	44.692
7.12847	7.088	10.431	35.674	54.323	34.573	42.597
7.13542	7.398	7.873	31.867	50.682	29.716	38.887
7.14236	6.679	7.906	30.82	47.381	21.386	39.233
7.14931	3.092	7.936	23.809	47.142	22.52	31.945
7.15625	3.434	9.193	22.591	42.47	19.569	28.31
7.16319	2.573	7.346	18.565	37.573	16.872	17.817
7.17014	1.609	3.818	21.378	32.67	13.832	15.626
7.17708	1.749	3.04	26.179	24.065	12.988	13.198
7.18403	0.136	2.329	27.096	19.092	9.379	10.906
7.19097	0.441	2.343	23.672	14.121	6.22	7.735
7.19792	-3.084	2.009	25.387	9.262	3.092	2.511
7.20486	-2.805	0.175	21.313	2.264	-4.039	0.26
7.21181	-3.016	-0.863	15.52	-0.731	-7.185	-7.172
7.21875	-1.558	-0.432	11.47	6.539	-10.382	-11.939
7.22569	-3.172	-2.385	9.5	1.497	-12.831	-14.203
7.23264	-5.706	-3.309	7.718	-8.922	-15.991	-19.955
7.23958	-5.436	-3.928	3.739	-14.013	-12.698	-25.774
7.24653	-5.855	-6.431	0.706	-19.157	-16.171	-28.349
7.25347	-5.579	-6.406	-3.196	-15.684	-19.307	-34.772
7.26042	-6.545	-6.395	-7.076	-30.117	-22.708	-39.764
7.26736	-6.248	-7.953	-6.01	-37.575	-25.962	-41.992
7.27431	-5.952	-9.542	-17.527	-43.393	-29.195	-41.448
7.28125	-8.067	-9.533	-3.97	-47.782	-33.941	-43.652
7.28819	-8.357	-9.523	-7.659	-46.751	-41.248	-49.996
7.29514	-10.356	-10.043	-11.344	-51.852	-40.326	-52.182
7.30208	-11.867	-11.727	-8.587	-57.036	-42.623	-56.106
7.30903	-14.399	-11.72	-17.586	-58.593	-45.796	-51.27
7.31597	-14.088	-13.702	-18.907	-63.762	-46.905	-60.595
7.32292	-14.416	-16.802	-22.334	-68.968	-56.191	-63.564
7.32986	-16.469	-14.79	-17.278	-70.033	-57.101	-70.966
7.33681	-16.897	-14.739	-16.547	-69.515	-60.235	-71.607
7.34375	-16.565	-14.587	-18.34	-74.562	-63.328	-73.801
7.35069	-17.198	-14.535	-18.074	-86.891	-67.017	-75.834
7.35764	-16.933	-18.555	-21.409	-91.947	-70.122	-77.862
7.36458	-16.545	-18.479	-25.933	-95.519	-72.242	-86.022
7.37153	-15.694	-19.656	-30.956	-99.551	-75.246	-91.555
7.37847	-15.357	-17.276	-34.199	-105.509	-77.563	-93.445
7.38542	-16.763	-19.478	-32.539	-109.406	-80.587	-91.159
7.39236	-18.379	-22.448	-28.2	-107.682	-83.619	-93.032
7.39931	-17.935	-22.332	-29.362	-110.777	-88.678	-95.581
7.40625	-18.717	-22.223	-27.669	-109.725	-93.388	-97.319
7.41319	-18.581	-18.518	-32.249	-114.546	-96.112	-99.06
7.42014	-19.016	-24.577	-35.084	-125.038	-99.047	-98.409
7.42708	-19.802	-21.974	-37.926	-129.782	-95.414	-100.118
7.43403	-19.821	-24.364	-39.481	-130.499	-98.28	-101.828
7.44097	-20.117	-22.272	-35.11	-131.779	-106.952	-100.944
7.44792	-19.741	-24.672	-37.027	-122.762	-109.864	-105.634
7.45486	-19.255	-22.923	-34.669	-127.333	-105.83	-107.146
7.46181	-18.881	-22.769	-30.41	-131.928	-97.584	-114.931
7.46875	-19.951	-22.348	-23.723	-136.454	-98.034	-116.386
7.47569	-19.57	-22.182	-26.449	-133.9	-80.303	-99.438
7.48264	-19.54	-22.005	-30.341	-126.205	-82.031	-94.058
7.48958	-19.128	-20.632	-32.998	-123.617	-81.429	-92.031
7.49653	-18.925	-19.819	-33.403	-124.044	-81.469	-87.309
7.50347	-18.333	-17.246	-33.879	-125.329	-82.757	-87.523
7.51042	-15.875	-17.094	-20.826	-123.023	-80.36	-87.21
7.51736	-14.617	-18.167	-17.485	-100.421	-83.162	-86.48
7.52431	-14.22	-18.006	-7.829	-98.519	-68.67	-67.501
7.53125	-13.724	-17.505	-0.652	-88.339	-69.856	-68.118
7.53819	-12.686	-14.605	3.652	-88.762	-61.866	-60.562
7.54514	-12.211	-13.946	5.215	-83.177	-51.749	-51.026
7.55208	-10.618	-12.443	5.866	-73.125	-47.294	-49.964
7.55903	-10.24	-8.416	11.723	-69.072	-47.066	-38.89
7.56597	-9.838	-8.102	9.62	-72.245	-38.672	-35.792
7.57292	-9.224	-7.932	8.941	-67.79	-36.924	-35.066
7.57986	-7.772	-8.239	9.899	-55.378	-39.55	-24.666
7.58681	-7.369	-8.083	13.068	-53.234	-33.436	-19.562
7.59375	-7.48	-7.08	22.948	-48.192	-27.682	-20.709
7.60069	-7.081	-5.866	28.855	-37.228	-26.002	-19.217
7.60764	-3.549	-5.707	37.492	-40.428	-26.857	-7.217
7.61458	-2.04	-4.544	42.591	-22.861	-16.702	0.871
7.62153	-1.651	0.343	43.979	-23.769	-3.423	5.439
7.62847	-1.261	0.654	52.03	-16.996	-5.957	7.173
7.63542	-0.253	0.822	50.202	-10.416	3.162	10.764
7.64236	0.471	1.418	48.21	-5.833	0.629	14.698
7.64931	0.862	0.484	46.524	-6.589	2.92	26.974
7.65625	-1.301	4.098	52.165	23.918	7.977	28.89
7.66319	-0.94	5.129	54.643	20.84	11.042	26.857
7.67014	0.519	5.331	53.81	28.726	16.502	32.137
7.67708	3.056	5.5	61.567	25.423	14.052	45.884
7.68403	3.435	4.082	67.035	31.364	30.705	47.05
7.69097	3.818	4.805	66.128	35.479	28.603	53.013
7.69792	5.923	4.971	67.994	42.96	31.418	52.16
7.70486	6.281	6.453	75.096	52.742	34.592	47.563
7.71181	5.909	9.872	82.13	49.299	41.434	46.75
7.71875	6.29	6.796	80.596	46.976	39.063	58.251
7.72569	6.469	9.154	78.025	64.551	38.598	57.846
7.73264	9.688	9.312	75.64	65.644	50.284	64.326
7.73958	10.058	10.26	75.24	68.829	48.993	72.67
7.74653	10.403	10.918	74.79	74.322	46.609	73.505
7.75347	10.861	11.086	73.416	83.661	63.805	71.184
7.76042	10.578	11.194	71.715	83.469	61.642	75.945
7.76736	10.95	11.368	70.372	81.623	62.57	75.723
7.77431	11.33	12.983	73.508	84.053	70.449	79.048
7.78125	11.476	13.274	72.165	95.393	68.34	79.969
7.78819	11.848	13.45	69.376	97.508	73.062	83.487
7.79514	11.429	13.627	68.176	103.493	74.523	87.609
7.80208	10.035	14.052	67.076	112.001	73.514	90.685
7.80903	10.392	13.425	55.899	119.022	74.15	91.635
7.81597	10.737	17.669	54.963	118.177	80.296	92.818
7.82292	11.316	16.469	55.545	125.205	82.647	93.05
7.82986	11.659	16.629	59.847	130.878	85.768	96.561
7.83681	11.515	14.203	58.966	127.461	84.902	101.502
7.84375	11.871	14.383	65.026	124.101	90.895	105.318
7.85069	14.507	15.365	66.2	122.953	95.242	114.242
7.85764	16.368	15.568	75.672	133.57	93.175	113.673
7.86458	16.706	15.744	81.975	142.397	91.177	113.149
7.87153	14.624	15.557	82.09	138.911	89.597	112.399
7.87847	14.974	17.555	85.057	137.686	96.818	114.585
7.88542	18.944	15.956	84.228	137.575	99.106	118.221
7.89236	19.299	16.195	79.084	145.799	97.077	117.695
7.89931	16.097	16.362	75.141	152.189	95.034	117.209
7.90625	16.452	19.74	71.396	148.849	99.496	120.7
7.91319	16.8	20.976	60.352	145.55	102.796	123.224
7.92014	16.784	20.737	59.545	148.958	101.82	122.752
7.92708	15.361	20.934	61.206	145.665	98.751	123.215
7.93403	14.966	18.651	69.772	142.398	97.84	122.85
7.94097	15.312	18.836	75.51	145.366	103.05	119.048
7.94792	14.124	17.866	77.606	143.333	101.043	116.664
7.95486	14.48	18.339	78.839	138.943	99.832	113.165
7.96181	14.832	18.559	79.075	136.94	97.209	109.624
7.96875	15.721	18.779	78.401	140.705	102.72	109.21
7.97569	15.352	16.663	75.388	142.174	100.95	108.834
7.98264	13.797	15.826	74.462	134.582	104.243	111.576
7.98958	12.279	16.012	69.667	134.255	102.502	102.506
7.99653	12.636	16.237	57.868	128.756	97.624	108.078
8.00347	11.543	18.675	55.703	128.345	95.92	96.238
8.01042	11.917	18.986	56.762	134.221	96.01	93.31
8.01736	12.309	19.236	56.902	131.347	94.758	92.503
8.02431	13.249	17.132	57.477	119.8	93.752	92.425
8.03125	11.894	15.325	57.085	112.915	92.204	82.669
8.03819	12.291	15.284	56.128	113.446	82.058	82.724
8.04514	11.441	14.975	46.137	110.853	77.145	79.638
8.05208	11.051	13.582	42.073	108.282	75.785	79.512
8.05903	11.246	13.729	31.807	105.189	80.731	75.884
8.06597	8.202	14.234	28.981	95.265	79.46	68.326
8.07292	9.377	13.108	15.018	91.273	63.452	67.679
8.07986	6.415	13.455	15.168	88.82	61.588	62.363
8.08681	8.09	12.515	14.545	88.224	59.971	62.8
8.09375	7.296	11.862	16.743	87.245	59.025	57.263
8.10069	7.055	9.542	19.877	83.544	58.997	57.091
8.10764	7.167	12.147	26.768	77.097	57.802	55.386
8.11458	5.452	12.297	27.094	69.005	51.671	47.613
8.12153	2.888	12.671	15.567	60.834	44.682	47.609
8.12847	2.53	8.353	16.036	54.462	36.202	35.231
8.13542	2.667	8.76	16.573	52.376	35.27	26.567
8.14236	2.304	9.177	15.933	43.542	35.323	26.158
8.14931	2.79	4.341	0.33	41.563	34.366	23.841
8.15625	3.723	3.941	-0.644	39.574	30.326	24.523
8.16319	4.2	2.361	-0.13	28.997	28.602	18.364
8.17014	3.795	2.804	3.953	24.533	25.361	15.944
8.17708	2.109	4.405	7.042	22.755	16.108	10.738
8.18403	0.583	4.843	13.571	11.123	14.266	5.941
8.19097	-1.545	5.27	14.008	6.304	8.983	3.684
8.19792	-1.04	4.777	16.51	7.61	7.626	3.344
8.20486	-0.708	1.56	19.182	2.855	3.064	-4.35
8.21181	-0.759	1.956	19.755	1.008	4.195	-3.474
8.21875	-3.418	2.453	8.095	-2.078	1.28	-8.065
8.22569	-4.85	2.712	2.953	-3.867	2.394	-1.629
8.23264	-4.342	3.165	-8.068	-9.393	6.312	-18.351
8.23958	-3.859	0.878	-7.477	-20.174	9.436	-25.019
8.24653	0.291	-0.225	-10.784	-21.861	4.425	-24.124
8.25347	-2.785	-0.924	-7.122	-19.527	-8.067	-23.218
8.26042	-1.563	-1.77	-11.156	-21.219	-9.74	-25.445
8.26736	-4.078	-1.064	-10.774	-23.679	-14.489	-28.548
8.27431	-4.651	-0.902	-12.452	-25.387	-15.385	-29.301
8.28125	-5.39	-3.628	-13.001	-27.079	-20.511	-35.9
8.28819	-4.875	-3.182	-15.107	-25.715	-30.164	-35.213
8.29514	-4.369	-2.736	-15.269	-35.075	-31.966	-43.262
8.30208	-6.38	-3.436	-29.388	-37.346	-35.049	-42.388
8.30903	-5.89	-5.22	-40.582	-38.991	-33.916	-44.837
8.31597	-6.468	-6.713	-50.76	-40.489	-36.936	-44.274
8.32292	-6.048	-6.249	-54.382	-42.159	-46.658	-44.269
8.32986	-5.944	-5.485	-49.511	-46.829	-47.538	-45.776
8.33681	-9.385	-5.038	-46.355	-54.156	-51.965	-45.102
8.34375	-9.852	-5.571	-44.331	-58.503	-52.866	-50.736
8.35069	-8.4	-8.346	-43.606	-60.045	-53.745	-51.703
8.35764	-7.224	-8.042	-36.335	-51.223	-63.517	-50.78
8.36458	-6.704	-7.59	-34.838	-52.71	-52.587	-56.254
8.37153	-7.188	-9.439	-33.786	-52.062	-62.171	-57.52
8.37847	-7.016	-10.327	-37.698	-59.549	-61.201	-58.83
8.38542	-6.505	-9.876	-41.079	-61.001	-61.985	-57.908
8.39236	-8.342	-9.437	-44.19	-68.313	-62.77	-56.887
8.39931	-8.962	-8.487	-43.885	-69.714	-63.827	-62.461
8.40625	-9.164	-10.234	-42.985	-70.989	-65.229	-61.414
8.41319	-8.646	-12.527	-30.066	-72.283	-65.954	-62.912
8.42014	-8.124	-13.713	-22.501	-74.85	-67.787	-61.749
8.42708	-7.598	-13.556	-25.672	-81.459	-70.06	-65.626
8.43403	-9.378	-12.769	-20.901	-86.663	-73.523	-72.677
8.44097	-8.861	-10.888	-6.348	-87.927	-74.215	-71.477
8.44792	-9.881	-10.415	-5.361	-87.661	-74.176	-68.66
8.45486	-10.031	-9.954	-12.304	-79.409	-68.371	-67.497
8.46181	-8.826	-13.472	-11.343	-80.573	-75.552	-67.853
8.46875	-8.975	-13.003	-13.728	-98.576	-69.73	-66.664
8.47569	-9.253	-12.148	-16.435	-99.685	-70.101	-70.888
8.48264	-9.364	-10.903	-16.582	-99.327	-70.704	-71.691
8.48958	-8.839	-10.44	-19.225	-94.916	-72.324	-73.914
8.49653	-8.795	-10.444	-18.481	-95.95	-72.949	-74.255
8.50347	-8.273	-11.575	-17.362	-90.75	-69.352	-76.492
8.51042	-10.13	-14.199	-14.031	-91.783	-68.431	-75.269
8.51736	-10.21	-14.124	-0.499	-95.768	-70.542	-68.409
8.52431	-9.687	-13.217	0.183	-96.69	-73.642	-66.024
8.53125	-9.161	-13.583	-2.272	-88.112	-74.153	-63.123
8.53819	-8.423	-12.656	-12.43	-87.551	-71.447	-61.824
8.54514	-7.886	-12.189	-20.609	-88.468	-71.355	-63.783
8.55208	-7.386	-11.705	-36.048	-82.511	-70.631	-62.824
8.55903	-8.339	-11.412	-43.301	-76.757	-71.168	-62.962
8.56597	-10.446	-12.232	-42.474	-77.696	-59.509	-60.198
8.57292	-9.945	-11.746	-50.576	-76.562	-57.655	-61.411
8.57986	-8.113	-11.659	-42.563	-71.099	-54.086	-57.545
8.58681	-7.61	-11.181	-41.77	-72.016	-54.714	-56.282
8.59375	-7.592	-10.433	-34.657	-61.832	-57.372	-54.587
8.60069	-8.241	-9.967	-32.56	-62.703	-57.926	-53.349
8.60764	-7.738	-10.261	-32.557	-66.258	-57.86	-51.68
8.61458	-7.236	-11.085	-24.918	-67.167	-58.447	-50.353
8.62153	-6.637	-10.167	-34.098	-58.785	-57.243	-46.12
8.62847	-6.705	-10.09	-32.905	-52.04	-57.561	-44.838
8.63542	-6.223	-9.173	-31.742	-48.245	-49.809	-45.036
8.64236	-5.745	-9.944	-25.147	-46.324	-50.464	-43.775
8.64931	-5.339	-7.305	-23.803	-46.683	-47.645	-42.507
8.65625	-5.308	-8.981	-21.671	-43.209	-44.837	-39.119
8.66319	-5.622	-8.869	-16.93	-44.283	-40.483	-32.916
8.67014	-5.118	-8.416	-3.131	-45.398	-31.849	-30.015
8.67708	-4.619	-7.2	3.779	-30.366	-30.96	-28.651
8.68403	-4.391	-6.738	9.059	-24.601	-24.547	-22.243
8.69097	-4.269	-6.26	20.155	-23.46	-20.723	-19.345
8.69792	-3.911	-4.158	26.125	-20.755	-20.237	-17.256
8.70486	-3.342	-3.685	22.221	-15.956	-7.367	-8.344
8.71181	-2.55	-3.929	16.413	-10.223	-3.794	-7.139
8.71875	-1.058	-4.139	15.469	-2.324	-4.5	-2.561
8.72569	-0.611	-3.672	16.176	8.02	3.809	5.264
8.73264	-1.353	-3.206	21.535	8.71	12.792	11.487
8.73958	-1.198	0.35	22.892	22.719	19.601	22.816
8.74653	-2.959	0.795	28.217	22.779	26.109	25.164
8.75347	-0.303	0.572	43.464	30.102	25.402	26.362
8.76042	1.962	1.008	49.755	43.505	39.89	27.518
8.76736	2.414	1.537	57.023	44.696	39.52	36.203
8.77431	1.406	4.755	57.629	48.975	48.552	46.318
8.78125	1.835	5.188	60.209	51.802	47.848	49.383
8.78819	3.184	4.067	58.529	63.853	47.652	51.123
8.79514	4.897	4.482	40.432	64.059	60.02	53.39
8.80208	5.335	5.118	39.312	76.617	61.424	58.191
8.80903	5.583	5.519	27.419	83.426	60.766	64.136
8.81597	4.39	5.909	20.27	92.519	60.541	66.931
8.82292	4.8	7.055	20.685	98.148	64.142	76.414
8.82986	7.239	8.297	18.051	97.163	63.37	80.659
8.83681	7.656	8.895	19.629	96.224	74.926	78.773
8.84375	7.116	9.287	10.426	96.611	77.347	74.707
8.85069	7.209	9.682	19.843	95.672	78.652	75.893
8.85764	7.066	11.224	11.573	102.982	82.718	84.676
8.86458	8.02	7.929	1.529	101.993	82.041	88.403
8.87153	9.254	11.841	-5.638	107.833	76.058	89.558
8.87847	9.681	10.227	-9.203	109.428	74.176	91.96
8.88542	8.155	10.613	-8.386	108.425	73.45	89.032
8.89236	7.352	10.991	-1.118	114.92	72.722	90.262
8.89931	8.66	9.648	12.34	113.934	75.275	87.833
8.90625	6.41	10.038	18.01	104.433	74.519	89.041
8.91319	8.89	9.905	21.16	103.449	73.763	85.043
8.92014	8.722	10.275	20.975	112.179	76.53	81.744
8.92708	9.128	11.838	24.471	111.196	75.815	83.019
8.93403	9.05	12.195	22.916	116.674	75.096	84.26
8.94097	7.699	12.274	15.085	104.612	72.117	80.896
8.94792	6.446	10.31	15.916	111.836	71.403	82.119
8.95486	5.441	10.69	23.908	91.076	75.001	83.401
8.96181	5.821	7.415	26.262	93.411	74.251	84.674
8.96875	6.208	10.939	31.278	89.325	72.891	75.905
8.97569	4.969	8.136	37.16	91.644	70.706	73.947
8.98264	7.28	9.305	38.078	87.062	71.414	75.13
8.98958	5.76	9.687	50.873	82.373	69.175	76.356
8.99653	7.508	11.092	54.523	80.542	67.347	72.224
9.00347	5.058	11.461	63.649	77.182	64.165	66.996
9.01042	4.846	9.707	64.193	78.77	66.019	66.434
9.01736	4.312	9.804	64.703	70.586	52.983	66.484
9.02431	4.689	9.001	55.094	69.74	52.3	55.806
9.03125	5.065	9.356	45.554	59.785	51.581	49.423
9.03819	4.141	9.701	23.009	58.528	52.703	47.18
9.04514	4.518	9.299	19.047	56.555	52.012	46.401
9.05208	4.898	6.678	18.734	55.647	47.387	45.444
9.05903	2.194	4.109	13.117	54.811	46.383	45.082
9.06597	3.037	4.45	12.474	56.644	44.642	43.2
9.07292	3.393	5.694	9.461	49.555	41.379	41.661
9.07986	3.751	6.033	9.22	48.653	42.035	38.227
9.08681	1.221	6.025	1.611	44.001	33.401	39.471
9.09375	0.806	5.776	-10.352	43.022	31.578	40.716
9.10069	1.178	6.119	-21.622	36.323	30.553	39.363
9.10764	1.504	3.036	-41.468	44.681	29.831	30.259
9.11458	1.863	2.592	-46.034	34.449	18.484	26.413
9.12153	-0.204	2.472	-54.261	32.863	17.75	25.145
9.12847	-0.174	1.861	-53.493	31.742	18.929	26.433
9.13542	-0.246	-1.598	-48.28	26.706	24.131	12.973
9.14236	0.318	-2.166	-46.906	23.883	17.574	9.557
9.14931	0.476	-1.092	-41.076	23.016	16.829	8.919
9.15625	-0.833	-2.086	-39.037	26.92	8.404	1.716
9.16319	-0.477	-1.774	-38.219	28.99	3.904	1.922
9.17014	-2.372	-2.217	-46.56	25.131	6.523	3.261
9.17708	-2.256	-1.938	-47.409	27.061	2.584	-0.497
9.18403	-3.669	-1.641	-46.549	16.671	5.162	-1.784
9.19097	-3.31	-3.631	-39.813	3.432	-3.893	-1.051
9.19792	-2.942	-3.331	-29.763	2.685	11.091	-6.65
9.20486	-2.231	-3.226	-24.145	6.863	0.587	-5.769
9.21181	-3.665	-2.904	-7.874	6.167	-0.086	-8.117
9.21875	-2.306	-3.512	-5.363	-0.219	-10.959	-10.897
9.22569	-2.779	-5.058	13.539	-14.767	-11.652	-9.48
9.23264	-1.748	-4.783	29.941	-15.418	-6.788	-10.714
9.23958	-1.953	-4.473	31.399	-18.146	-7.362	-19.152
9.24653	-1.599	-3.788	31.697	-20.043	-7.947	-18.806
9.25347	-2.101	-3.456	29.099	-24.421	-17.372	-23.126
9.26042	-2.457	-4.511	12.843	-32.937	-18.276	-15.797
9.26736	-2.72	-5.063	10.291	-34.055	-18.827	-20.218
9.27431	-2.419	-3.858	7.491	-33.87	-19.347	-21.136
9.28125	-2.746	-4.387	7.03	-31.895	-25.252	-23.853
9.28819	-2.849	-4.538	7.424	-32.407	-27.171	-25.511
9.29514	-4.608	-4.219	15.921	-35.914	-27.603	-29.351
9.30208	-4.228	-3.701	16.214	-43.499	-37.509	-31.16
9.30903	-3.042	-2.893	15.835	-43.901	-37.921	-32.191
9.31597	-2.663	-3.049	9.986	-38.345	-34.287	-34.029
9.32292	-2.664	-6.33	-5.977	-38.59	-33.43	-36.12
9.32986	-2.47	-5.989	-7.014	-39.024	-33.887	-33.758
9.33681	-3.461	-3.991	-19.726	-49.28	-34.257	-32.68
9.34375	-4.746	-3.655	-43.346	-58.247	-39.054	-32.497
9.35069	-4.153	-4.615	-46.049	-58.576	-43.962	-37.814
9.35764	-4.256	-6.029	-54.776	-44.19	-49.57	-37.585
9.36458	-3.607	-5.69	-58.801	-41.497	-49.936	-35.892
9.37153	-3.487	-8.759	-55.144	-41.772	-50.192	-36.627
9.37847	-6.703	-8.951	-54.585	-43.967	-50.614	-39.249
9.38542	-6.375	-8.609	-53.934	-44.224	-50.655	-37.484
9.39236	-5.935	-7.204	-59.891	-44.412	-48.366	-46.734
9.39931	-6.28	-6.856	-65.725	-52.766	-48.566	-47.869
9.40625	-5.906	-7.658	-72.952	-52.885	-48.959	-46.58
9.41319	-7.177	-9.902	-72.308	-53.339	-51.855	-53.088
9.42014	-6.793	-9.181	-71.572	-53.549	-58.292	-54.082
9.42708	-5.68	-9.265	-66.591	-55.093	-60.81	-53.356
9.43403	-5.299	-8.533	-61.494	-55.228	-63.604	-51.842
9.44097	-6.115	-7.967	-48.564	-58.747	-61.641	-54.74
9.44792	-5.749	-7.614	-26.928	-52.408	-58.075	-53.795
9.45486	-4.823	-9.172	-23.364	-66.971	-57.412	-57.67
9.46181	-4.466	-8.841	-20.865	-67.204	-57.824	-55.867
9.46875	-4.587	-8.578	-6.034	-72.237	-56.484	-55.159
9.47569	-5.516	-9.297	-5.738	-81.981	-50.174	-53.628
9.48264	-6.874	-10.984	0.788	-72.443	-50.558	-51.845
9.48958	-6.505	-10.717	4.434	-74.326	-60.661	-50.722
9.49653	-5.72	-10.393	4.714	-74.051	-61.08	-58.695
9.50347	-5.37	-8.659	-1.933	-74.605	-62.162	-62.114
9.51042	-5.918	-8.342	-1.586	-77.004	-62.946	-55.204
9.51736	-6.092	-9.745	6.45	-80.143	-63.358	-52.353
9.52431	-5.878	-10.269	10.233	-81.86	-58.503	-50.56
9.53125	-5.405	-9.939	20.134	-81.978	-58.915	-48.847
9.53819	-5.341	-9.116	21.379	-70.487	-59.264	-48.394
9.54514	-4.559	-8.62	32.46	-70.292	-55.672	-47.944
9.55208	-4.689	-8.468	32.352	-62.373	-50.575	-46.237
9.55903	-3.904	-7.276	12.464	-66.055	-50.886	-48.113
9.56597	-4.69	-7.001	-1.849	-66.162	-51.162	-46.41
9.57292	-4.453	-6.723	-8.691	-66.238	-42.087	-44.711
9.57986	-4.349	-7.409	-27.672	-47.959	-46.583	-41.412
9.58681	-4.662	-7.124	-33.341	-37.416	-41.808	-33.131
9.59375	-4.357	-7.251	-34.607	-30.545	-42.179	-31.417
9.60069	-4.663	-7.304	-43.337	-26.971	-39.153	-30.464
9.60764	-3.543	-6.991	-43.073	-26.75	-36.079	-29.639
9.61458	-3.227	-6.708	-49.312	-27.101	-36.443	-33.656
9.62153	-2.904	-5.831	-61.141	-26.857	-33.483	-31.935
9.62847	-2.726	-7.98	-61.566	-22.139	-24.451	-25.358
9.63542	-2.566	-5.274	-73.818	-19.643	-23.72	-22.735
9.64236	-2.27	-4.345	-73.263	-18.22	-24.002	-22.015
9.64931	-3.075	-4.108	-69.206	-13.809	-24.282	-30.323
9.65625	-4.952	-3.866	-66.014	-4.782	-22.274	-28.64
9.66319	-4.655	-3.269	-59.459	-4.587	-22.628	-26.994
9.67014	-3.387	-1.52	-43.057	-3.814	-15.117	-17.088
9.67708	-2.504	-1.249	-42.708	-3.596	-8.76	-8.905
9.68403	-2.814	0.136	-42.04	3.352	-6.923	-7.19
9.69097	-2.097	0.394	-27.828	3.592	-6.819	-6.22
9.69792	-3.46	0.043	-18.419	0.596	-6.92	-6.469
9.70486	-2.897	0.281	-16.978	0.854	12.963	-5.624
9.71181	-2.615	-2.17	-13.685	3.514	12.824	-3.883
9.71875	-2.314	0.079	2.753	12.451	24.29	-2.168
9.72569	-0.989	0.077	21.754	15.156	22.679	5.744
9.73264	-0.195	0.329	40.173	25.539	23.956	10.742
9.73958	0.131	0.45	50.857	29.91	32.586	12.501
9.74653	0.456	-0.244	53.396	32.106	37.929	14.265
9.75347	1.829	0.952	67.191	41.868	32.445	20.654
9.76042	1.025	1.654	84.247	42.273	42.854	27.313
9.76736	2.219	1.897	84.234	42.286	48.129	31.809
9.77431	-1.03	1.607	84.229	42.658	49.162	33.684
9.78125	2.781	1.87	78.072	59.818	49.077	37.458
9.78819	1.244	3.58	73.828	60.282	49.06	41.981
9.79514	1.532	4.995	69.83	68.965	56.247	45.362
9.80208	1.453	5.058	68.343	72.584	48.338	48.071
9.80903	1.725	5.326	68.872	73.464	56.693	49.886
9.81597	2.151	4.395	69.605	75.864	55.162	47.893
9.82292	3.93	3.952	58.706	79.396	59.34	49.736
9.82986	2.72	4.207	51.327	94.132	59.361	51.702
9.83681	2.025	6.06	43.616	94.685	59.433	53.549
9.84375	0.996	6.326	43.53	95.395	65.753	55.391
9.85069	1.258	4.521	4.304	91.58	65.79	61.379
9.85764	1.431	4.776	1.094	92.556	69.102	63.936
9.86458	2.574	7.907	-9.567	92.628	69.102	65.803
9.87153	1.977	8.172	-8.814	93.805	70.736	61.06
9.87847	2.841	5.866	-14.457	101.274	73.679	62.932
9.88542	3.104	5.939	-31.348	101.953	73.74	64.812
9.89236	3.367	6.377	-30.906	92.601	73.806	56.548
9.89931	4.525	5.587	-30.318	93.324	70.065	55.343
9.90625	3.941	8.588	-29.952	91.586	74.842	60.237
9.91319	4.196	8.261	-27.304	96.881	79.03	58.31
9.92014	2.549	8.489	-15.011	97.606	78.958	51.638
9.92708	2.793	8.72	-7.934	98.358	80.564	51.891
9.93403	2.869	8.581	5.019	97.978	70.643	55.277
9.94097	3.127	8.783	10.411	95.676	79.961	56.432
9.94792	3.273	5.267	16.904	96.423	79.902	63.418
9.95486	1.705	5.529	24.782	98.514	81.009	60.046
9.96181	1.948	6.72	42.054	99.133	80.989	57.369
9.96875	3.148	6.956	55.333	90.937	73.512	55.469
9.97569	3.413	6.387	58.103	86.837	73.552	57.23
9.98264	1.327	5.886	64.331	79.75	73.574	52.294
9.98958	1.558	5.623	71.574	79.249	72.099	54.037
9.99653	3.991	5.829	72.526	79.79	72.028	57.684
10.0035	4.24	8.027	72.534	88.248	71.95	59.324
10.0104	3.571	8.257	74.513	88.832	62.34	50.225
10.0174	2.044	4.972	91.237	80.67	62.256	46.099
10.0243	1.544	4.12	103.298	77.509	62.153	46.019
10.0312	1.886	3.586	103.541	75.259	54.893	47.279
10.0382	2.122	3.8	98.456	74.967	54.765	45.621
10.0451	3.571	4.09	94.059	59.919	51.581	39.499
10.0521	3.804	5.07	94.754	60.312	44.79	40.103
10.059	3.495	5.804	87.131	62.782	44.681	38.568
10.066	3.481	6.027	79.105	65.118	44.224	40.226
10.0729	2.603	5.813	45.946	63.623	44.492	39.218
10.0799	2.284	4.156	32.112	62.241	41.441	34.827
10.0868	2.522	6.147	16.245	52.439	41.24	36.453
10.0938	2.721	4.545	-15.962	52.362	35.435	34.447
10.1007	1.69	2.377	-32.026	52.751	30.168	26.125
10.1076	1.236	1.666	-42.257	53.208	28.471	27.173
10.1146	1.388	2.762	-44.419	53.261	23.987	29.237
10.1215	0.214	2.051	-45.043	50.766	23.666	21.543
10.1285	0.428	2.115	-54.751	39.679	23.294	23.004
10.1354	1.401	2.283	-68.535	42.206	17.571	24.552
10.1424	1.616	2.508	-68.38	37.825	16.734	20.624
10.1493	0.375	3.592	-58.184	38.085	16.93	10.017
10.1562	0.115	3.782	-60.991	20.994	15.562	10.444
10.1632	0.413	2.543	-64.366	10.978	13.312	8.571
10.1701	-0.898	-0.145	-49.793	10.952	12.502	6.697
10.1771	0.013	-1.954	-51.432	7.574	8.686	0.457
10.184	-0.047	0.242	-51.798	1.67	7.393	-3.51
10.191	0.41	0.419	-43.795	-2.468	7.32	-2.095
10.1979	0.352	1.048	-35.536	-2.644	-12.564	-7.756
10.2049	-0.245	1.25	-32.292	-17.985	-15.138	-13.774
10.2118	-0.05	1.445	-29.007	-36.436	-15.213	-12.436
10.2188	-1.971	-1.825	-24.199	-38.968	-15.206	-11.115
10.2257	-1.776	-2.694	-21.646	-47.687	-22.254	-18.231
10.2326	-1.578	-2.967	-3.56	-50.633	-28.485	-20.725
10.2396	-1.324	-2.891	-3.213	-50.762	-32.159	-20.24
10.2465	-1.122	-2.593	18.154	-52.275	-36.219	-29.38
10.2535	-0.917	-1.752	28.784	-52.499	-36.237	-35.438
10.2604	-1.373	-1.586	32.594	-62.79	-42.215	-28.351
10.2674	-1.168	-1.835	35.161	-66.553	-42.184	-32.465
10.2743	-1.837	-2.865	29.846	-66.642	-42.144	-46.688
10.2812	-1.7	-4.456	20.144	-75.125	-53.204	-45.243
10.2882	-2.373	-4.859	0.767	-76.867	-53.126	-45.277
10.2951	-3.451	-5.481	-13.267	-76.845	-52.997	-44.313
10.3021	-3.248	-5.706	-41.444	-85.932	-54.733	-44.768
10.309	-2.788	-5.52	-51.175	-88.122	-57.603	-49.058
10.316	-2.578	-6.803	-82.806	-89.973	-58.143	-49.975
10.3229	-2.822	-6.617	-101.969	-91.48	-62.32	-55.983
10.3299	-4.35	-6.647	-120.347	-91.257	-69.349	-57.257
10.3368	-4.147	-6.203	-132.973	-92.89	-77.933	-56.443
10.3438	-3.936	-6.265	-150.484	-87.18	-73.174	-54.847
10.3507	-2.99	-5.815	-153.822	-100.901	-73.048	-61.527
10.3576	-2.799	-5.533	-155.029	-93.1	-72.901	-64.386
10.3646	-3.347	-5.354	-165.284	-104.263	-80.632	-63.536
10.3715	-3.966	-8.417	-173.796	-103.849	-80.704	-65.047
10.3785	-6.215	-9.783	-176.336	-106.584	-80.459	-63.422
10.3854	-6.071	-10.561	-177.123	-111.411	-78.3	-67.287
10.3924	-5.866	-10.372	-160.036	-111.031	-75.354	-69.26
10.3993	-4.392	-9.799	-156.577	-117.128	-77.765	-67.652
10.4062	-4.184	-9.049	-155.402	-125.45	-71.42	-73.586
10.4132	-4.861	-8.837	-148.25	-125.108	-65.641	-74.363
10.4201	-5.934	-8.27	-147.025	-124.706	-65.324	-76.986
10.4271	-4.458	-8.068	-136.37	-128.256	-64.979	-71.186
10.434	-5.535	-7.839	-123.221	-127.792	-74.915	-77.337
10.441	-5.392	-7.639	-112.313	-127.365	-64.329	-75.985
10.4479	-5.189	-7.479	-104.488	-130.908	-74.222	-74.344
10.4549	-3.737	-11.395	-78.125	-130.353	-68.083	-72.667
10.4618	-3.255	-7.969	23.481	-119.214	-75.381	-71.562
10.4688	-3.071	-9.341	22.843	-116.762	-67.355	-71.153
10.4757	-6.503	-7.571	-13.104	-116.247	-64.433	-68.228
10.4826	-6.31	-5.91	-24.431	-115.765	-61.677	-67.844
10.4896	-4.09	-5.738	-25.072	-112.617	-60.168	-62.519
10.4965	-3.904	-7.423	-24.528	-112.13	-59.506	-56.284
10.5035	-5.889	-7.817	-25.29	-109.99	-59.143	-54.584
10.5104	-5.682	-8.9	-23.18	-117.221	-58.404	-56.05
10.5174	-5.484	-8.685	-26.869	-101.946	-49.888	-55.684
10.5243	-4.881	-6.495	-37.651	-102.778	-45.909	-60.372
10.5312	-5.25	-6.307	-57.746	-94.52	-45.691	-59.617
10.5382	-4.531	-8.482	-68.138	-93.891	-38.364	-56.983
10.5451	-3.941	-8.289	-82.272	-90.604	-44.925	-56.482
10.5521	-3.546	-8.095	-102.416	-80.477	-37.887	-57.582
10.559	-3.549	-7.851	-129.658	-79.239	-37.494	-55.863
10.566	-3.17	-7.643	-130.558	-79.21	-20.238	-47.039
10.5729	-3.834	-6.053	-138.803	-77.866	-16.7	-39.033
10.5799	-3.096	-3.974	-155.318	-59.829	-12.758	-39.629
10.5868	-4.647	-3.766	-159.366	-52.779	-9.524	-35.468
10.5938	-2.715	-3.543	-163.413	-51.992	2.009	-29.579
10.6007	-2.393	-3.731	-167.459	-51.113	8.617	-25.198
10.6076	-2.204	-3.694	-166.719	-39.895	9.062	-22.485
10.6146	-1.643	-3.5	-167.12	-35.122	16.782	-17.413
10.6215	-2.252	-3.317	-156.939	-30.97	33.719	-3.376
10.6285	-0.446	-1.783	-150.597	-11.083	42.782	-1.558
10.6354	-2.621	-1.177	-143.316	-7.57	43.387	-7.451
10.6424	-0.515	-0.976	-137.795	-5.674	14.419	-5.586
10.6493	-0.325	-0.817	-129.55	3.779	5.801	3.566
10.6562	-0.146	-0.61	379.132	4.928	6.439	14.759
10.6632	-1.012	-0.091	378.444	35.941	11.708	20.378
10.6701	-0.82	2.662	202.563	61.702	12.442	18.475
10.6771	-0.634	1.385	147.23	64.162	16.522	24.705
10.684	1.195	1.57	127.22	72.258	17.244	26.516
10.691	0.883	-0.06	124.652	85.431	21.595	31.386
10.6979	1.076	0.15	124.237	95.065	22.191	39.193
10.7049	1.273	1.469	123.308	100.205	39.696	42.534
10.7118	1.033	2.692	127.738	119.753	40.363	44.353
10.7188	2.903	2.966	132.277	112.688	41.072	48.77
10.7257	1.397	3.132	145.695	113.819	48.794	50.685
10.7326	2.112	3.39	146.769	113.428	49.45	52.242
10.7396	1.004	3.666	175.639	114.537	50.147	49.012
10.7465	2.482	3.861	180.255	121.999	56.089	50.898
10.7535	2.319	4.084	197.37	131.899	59.904	48.424
10.7604	2.844	7.274	205.965	132.145	66.085	54.663
10.7674	2.807	7.505	217.966	133.371	66.828	52.209
10.7743	3.011	8.219	230.288	123.541	61.962	60.133
10.7812	1.999	7.363	235.561	124.792	62.683	55.872
10.7882	2.193	8.645	241.986	126.599	63.463	63.795
10.7951	2.841	7.916	244.113	134.041	72.111	59.002
10.8021	3.019	8.126	244.685	132.44	72.931	60.889
10.809	1.839	8.333	239.32	133.796	73.735	62.794
10.816	2.029	7.29	234.576	132.86	73.23	64.662
10.8229	3.713	7.486	225.968	126.767	74.084	66.558
10.8299	3.9	7.686	209.459	128.466	78.219	68.444
10.8368	3.791	6.876	195.962	129.885	78.967	68.276
10.8438	3.971	7.808	166.745	131.344	79.853	67.669
10.8507	3.561	8.026	151.009	134.477	81.225	69.597
10.8576	3.762	8.274	115.998	133.357	82.162	73.979
10.8646	3.646	8.491	99.702	134.51	83.038	75.868
10.8715	3.84	8.02	69.216	119.741	74.216	67.998
10.8785	5.303	8.222	54.933	121.305	75.11	67.669
10.8854	5.474	8.415	29.98	135.182	74.97	68.768
10.8924	3.092	8.089	21.507	136.717	67.898	67.379
10.8993	3.261	6.821	9.984	131.317	68.835	69.314
10.9062	3.963	7.021	2.124	132.852	73.97	71.267
10.9132	4.146	7.138	1.069	134.399	75.11	69.743
10.9201	4.322	7.546	6.515	131.936	73.808	69.847
10.9271	2.895	8.462	6.996	124.471	74.966	71.799
10.934	3.317	8.688	7.14	126.086	75.922	71.254
10.941	2.386	8.815	11.623	131.967	76.017	72.206
10.9479	2.877	5.591	15.601	133.628	72.5	65.076
10.9549	3.051	7.627	28.72	113.742	73.65	67.037
10.9618	4.068	6.861	34.58	114.757	74.777	66.685
10.9688	4.248	7.074	50.868	116.548	71.132	61.181
10.9757	3.998	7.284	57.483	117.146	72.33	62.706
10.9826	4.139	9.87	66.53	118.859	74.394	65.137
10.9896	4.092	10.102	76.049	111.279	75.601	66.67
10.9965	3.224	6.997	93.093	113.033	75.749	57.64
11.0035	2.94	5.802	103.039	107.721	73.735	59.669
11.0104	2.769	6.013	105.81	109.036	74.856	61.685
11.0174	3.265	6.206	110.868	109.986	67.04	57.747
11.0243	4.957	5.783	114.461	92.5	62.439	51.42
11.0312	5.115	5.983	112.107	94.244	60.079	50.49
11.0382	3.905	6.184	94.869	95.912	62.188	50.682
11.0451	2.011	4.988	79.212	90.855	62.286	50.053
11.0521	2.173	5.001	76	84.806	54.159	43.183
11.059	4.175	5.199	47.374	85.754	48.6	41.011
11.066	4.331	4.714	0.114	85.674	51.188	40.907
11.0729	2.686	4.912	-9.463	77.375	52.267	34.589
11.0799	2.092	4.363	-38.352	74.323	53.262	30.944
11.0868	2.248	3.072	-44.331	74.409	42.656	27.862
11.0938	2.393	2.79	-58.916	59.73	41.195	28.225
11.1007	2.85	2.599	-62.309	47.585	39.264	22.729
11.1076	1.726	2.807	-72.008	45.155	40.3	21.56
11.1146	1.878	2.601	-77.435	45.495	27.498	13.925
11.1215	-0.208	5.266	-79.095	32.594	21.515	12.874
11.1285	-0.059	3.009	-88.795	31.826	11.345	10.574
11.1354	-0.012	2.237	-90.387	22.485	12.466	8.443
11.1424	0.307	2.326	-73.501	18.432	11.313	7.463
11.1493	1.127	1.035	-74.997	11.222	8.241	3.57
11.1562	1.29	2.734	-76.332	7.226	5.932	1.263
11.1632	1.338	1.451	-60.081	8.046	6.751	-4.368
11.1701	-0.544	0.898	-45.517	9.841	-6.55	-5.394
11.1771	-1.086	0.176	-37.354	-2.302	-8.43	-3.941
11.184	-0.928	0.392	-20.544	-8.722	-8.486	-5.536
11.191	-1.041	-0.614	-8.96	-8.007	-8.554	-13.281
11.1979	-0.875	-0.715	0.989	-20.213	-19.445	-12.368
11.2049	-1.428	-0.629	17.678	-25.78	-19.873	-15.479
11.2118	-1.261	-2.001	23.972	-35.149	-25.075	-18.952
11.2188	-0.915	-1.786	27.951	-37.138	-25.685	-20.69
11.2257	-0.738	-3.713	28.196	-51.189	-29.276	-28.885
11.2326	-1.675	-3.508	22.441	-51.216	-38.148	-27.146
11.2396	-1.868	-3.307	9.591	-55.653	-37.526	-30.445
11.2465	-1.707	-1.816	7.878	-55.709	-38.674	-36.231
11.2535	-2.987	-5.521	-9.31	-62.553	-45.286	-41.587
11.2604	-3.02	-5.831	-28.352	-68.117	-51.692	-44.287
11.2674	-2.65	-5.606	-48.481	-76.787	-51.821	-42.556
11.2743	-4.38	-5.398	-91.477	-77.12	-58.186	-45.393
11.2812	-3.717	-5.044	-119.457	-80.449	-65.935	-47.945
11.2882	-3.558	-4.84	-134.666	-82.37	-66.694	-46.694
11.2951	-3.398	-4.618	-148.622	-87.188	-72.012	-45.702
11.3021	-3.088	-6.226	-150.802	-106.57	-71.901	-52.921
11.309	-3.928	-6.019	-153.85	-108	-71.43	-55.828
11.316	-4.23	-5.761	-157.273	-107.813	-82.458	-56.575
11.3229	-4.089	-5.562	-156.862	-114.042	-81.877	-59.091
11.3299	-3.938	-5.907	-152.815	-112.926	-81.948	-63.517
11.3368	-4.422	-7.385	-150.315	-116.345	-96.498	-66.545
11.3438	-4.273	-8.288	-145.134	-122.457	-100.861	-64.697
11.3507	-4.165	-8.102	-134.795	-120.755	-102.664	-67.736
11.3576	-6.262	-7.546	-116.832	-132.027	-101.012	-69.028
11.3646	-6.107	-7.231	-90.983	-131.11	-103.31	-71.079
11.3715	-5.73	-7.024	-87.335	-136.906	-102.806	-79.291
11.3785	-5.108	-7.857	-77.959	-142.063	-106.47	-78.724
11.3854	-5.425	-8.068	-63.674	-144.265	-105.973	-77.848
11.3924	-4.622	-8.538	-56.35	-143.091	-105.494	-79.123
11.3993	-4.901	-9.239	-53.065	-147.826	-122.564	-81.945
11.4062	-4.76	-9.06	-36.73	-146.243	-122.057	-82.638
11.4132	-5.258	-8.882	-35.769	-155.122	-121.542	-82.431
11.4201	-5.116	-9.167	-23.082	-155.885	-123.496	-83.107
11.4271	-6.076	-9.3	-14.296	-154.226	-122.98	-91.617
11.434	-5.945	-11.312	-7.43	-164.094	-122.484	-89.82
11.441	-5.821	-11.123	-7.609	-167.968	-125.342	-88.05
11.4479	-5.695	-12.512	-23.794	-167.469	-124.922	-89.116
11.4549	-5.478	-10.552	-40.901	-165.778	-129.04	-89.286
11.4618	-5.464	-12.697	-56.126	-168.196	-128.601	-87.506
11.4688	-4.625	-9.25	-82.952	-174.79	-128.142	-89.039
11.4757	-4.493	-10.362	-103.906	-165.037	-129.832	-86.343
11.4826	-4.362	-9.476	-124.861	-158.4	-124.847	-87.429
11.4896	-3.192	-9.991	-134.642	-156.787	-122.609	-83.995
11.4965	-4.411	-9.18	-139.867	-158.557	-110.818	-83.579
11.5035	-4.822	-9.005	-149.067	-156.942	-110.306	-80.48
11.5104	-4.703	-8.839	-149.266	-151.906	-111.623	-76.98
11.5174	-5.205	-7.552	-149.329	-150.254	-111.151	-75.073
11.5243	-3.724	-7.387	-149.358	-148.608	-102.788	-71.898
11.5312	-3.599	-6.258	-143.209	-141.957	-94.505	-67.752
11.5382	-3.473	-6.094	-124.712	-121.76	-87.171	-61.847
11.5451	-3.579	-5.772	-124.547	-115.482	-81.392	-59.226
11.5521	-3.477	-8.296	-121.563	-111.027	-72.219	-58.424
11.559	-3.37	-7.635	-93.702	-100.128	-71.746	-55.495
11.566	-2.38	-7.999	-71.438	-84.34	-61.906	-47.621
11.5729	-3.177	-7.341	-51.375	-82.593	-45.797	-45.561
11.5799	-2.34	-5.681	-32.227	-80.799	-43.171	-42.537
11.5868	-2.241	-4.396	-19.874	-77.344	-34.803	-39.235
11.5938	-2.143	-4.143	-11.623	-67.286	-32.145	-34.864
11.6007	-1.85	-3.993	20.494	-64.193	-29.352	-29.257
11.6076	-1.396	-5.132	32.07	-55.185	-27.855	-23.802
11.6146	-1.048	-5.626	49.308	-40.85	-17.557	-20.299
11.6215	-0.921	-4.827	53.176	-29.143	-7.787	-16.585
11.6285	-0.89	-3.908	64.029	-25.892	-7.311	-13.357
11.6354	-1.093	-2.785	59.922	-20.017	-2.958	-11.279
11.6424	-1.022	-2.192	66.925	-14.024	-10.279	-9.326
11.6493	-0.94	-2.06	59.357	-11.967	-1.949	-6.034
11.6562	-1.42	-2.15	44.531	-9.695	3.744	-4.442
11.6632	-1.331	-2.798	35.388	-0.61	4.294	-2.818
11.6701	-1.559	-2.09	-1.091	6.95	10.128	-0.776
11.6771	-1.064	-1.957	-16.967	16.151	16.772	1.932
11.684	-1.439	-1.829	-37.629	17.947	20.694	4.209
11.691	-0.912	0.471	-37.82	20.086	22.227	12.347
11.6979	-1.278	-1.157	118.424	40.59	36.554	21.641
11.7049	-0.389	0.935	118.331	64.858	44.018	23.188
11.7118	-1.293	-0.881	109.482	75.35	45.218	26.757
11.7188	-1.271	-0.769	100.342	77.162	45.791	18.259
11.7257	-1.371	-0.642	84.061	78.947	45.754	29.807
11.7326	-1.144	0.934	74.429	87.116	46.308	29.896
11.7396	-1.398	1.578	72.658	89.597	44.349	32.838
11.7465	-1.352	2.411	72.783	95.57	61.256	35.857
11.7535	-1.349	1.824	73.391	107.226	64.605	37.359
11.7604	-1.297	1.474	81.097	109.066	65.162	36.702
11.7674	-0.926	1.583	83.789	103.536	65.757	37.388
11.7743	-0.869	4.175	107.655	101.73	68.776	38.893
11.7812	0.201	4.285	117.595	103.562	75.478	40.365
11.7882	-0.994	4.401	118.989	111.476	76.471	44.465
11.7951	-0.954	2.996	132.422	117.567	77.038	45.916
11.8021	-1.485	5.151	151.73	119.51	77.628	52.498
11.809	-1.439	4.525	157.949	122.692	80.064	53.716
11.816	0.912	5.432	158.4	127.547	96.837	56.276
11.8229	0.945	4.731	162.527	126.512	97.496	58.154
11.8299	1.079	6.512	162.087	131.515	98.153	59.626
11.8368	1.113	6.407	162.855	133.388	98.292	60.209
11.8438	1.142	6.52	149.771	135.395	98.856	58.713
11.8507	-0.714	6.621	139.121	133.191	96.352	63.067
11.8576	-0.685	6.22	133.625	135.144	96.999	61.577
11.8646	-0.141	4.715	101.895	143.566	106.272	57.557
11.8715	0.548	4.052	90.825	145.979	107.117	58.959
11.8785	0.504	4.167	50.522	147.994	107.631	64.558
11.8854	0.528	5.813	43.565	147.073	102.758	65.897
11.8924	0.555	5.918	10.653	147.414	102.397	69.747
11.8993	0.371	7.154	8.517	151.159	104.103	66.105
11.9062	0.396	5.941	-0.404	154.054	103.688	69.398
11.9132	0.418	6.097	-1.831	156.163	101.693	68.847
11.9201	0.826	6.038	-1.509	150.688	102.383	66.404
11.9271	0.852	5.566	6.814	145.329	105.934	65.542
11.934	0.87	5.665	16.866	144.011	109.455	62.334
11.941	2.072	5.756	32.223	144.668	112.655	65.262
11.9479	2.426	5.885	36.08	143.323	113.406	60.707
11.9549	2.45	5.894	43.738	144.121	111.28	56.203
11.9618	2.628	7.24	60.414	146.233	104.428	57.534
11.9688	2.646	4.856	70.428	148.351	105.206	58.899
11.9757	1.103	4.97	82.346	138.415	105.193	60.241
11.9826	0.916	5.063	90.62	140.574	105.958	60.358
11.9896	0.751	5.334	102.353	142.842	106.801	59.629
11.9965	0.745	5.429	109.938	141.776	97.454	52.615
12.0035	0.815	4.825	112.241	137.804	98.394	52.521
12.0104	1.025	4.795	116.727	133.426	95.979	52.755
12.0174	1.047	5.029	116.554	129.782	99.646	50.701
12.0243	1.677	5.189	115.902	132.195	100.564	50.232
12.0312	1.626	5.306	106.586	119.436	101.587	48.706
12.0382	1.665	4.951	91.501	121.904	79.373	41.669
12.0451	1.703	5.071	82.152	117.092	78.721	42.952
12.0521	1.684	6.039	72.811	118.118	77.256	44.425
12.059	1.011	6.136	51.867	110.016	70.809	35.998
12.066	1.035	6.004	40.439	108.385	70.265	35.163
12.0729	1.59	6.099	-6.562	99.939	71.633	36.679
12.0799	1.61	5.337	-28.261	86.192	62.823	37.236
12.0868	1.641	6.94	-31.324	88.346	64.261	25.648
12.0938	1.672	5.568	-34.07	87.057	65.642	26.269
12.1007	1.508	3.053	-39.043	87.857	53.465	27.858
12.1076	1.54	2.204	-46.932	78.439	54.887	23.557
12.1146	1.576	2.247	-45.984	80.662	56.377	23.867
12.1215	2.507	2.401	-44.598	71.137	42.72	25.446
12.1285	2.532	1.933	-26.956	59.046	40.268	22.76
12.1354	2.559	3.135	-19.838	56.466	41.792	18.277
12.1424	2.516	4.463	-18.417	55.543	34.918	18.603
12.1493	1.152	4.578	-16.945	52.006	31.441	9.688
12.1562	0.951	3.235	-1.314	38.244	30.186	9.781
12.1632	0.975	2.673	3.909	38.913	18.186	2.403
12.1701	1.602	2.337	8.622	31.011	19.654	3.199
12.1771	1.618	2.451	21.196	24.399	21.164	4.454
12.184	0.695	2.551	32.973	27.669	20.228	-0.627
12.191	-0.831	1.228	33.513	23.188	15.575	-2.131
12.1979	-0.907	0.822	33.998	13.94	9.187	-3.745
12.2049	-1.187	0.921	41.801	5.051	-1.091	-2.089
12.2118	-1.172	1.981	41.741	-3.626	0.457	-6.84
12.2188	-0.503	2.08	43.093	-0.065	-11.67	-8.276
12.2257	0.868	0.054	29.43	3.502	-7.642	-16.126
12.2326	1.141	0.153	26.634	-5.603	-8.584	-14.428
12.2396	1.358	0.262	26.107	-16.338	-9.562	-14.391
12.2465	2.039	-0.302	-4.045	-15.208	-20.142	-20.683
12.2535	2.045	-0.829	-16.825	-20.944	-18.483	-21.341
12.2604	-0.191	-1.865	-28.02	-20.766	-23.146	-19.993
12.2674	-0.831	-1.942	-48.644	-31.878	-33.795	-30.336
12.2743	-0.823	-1.833	-55.301	-30.287	-32.12	-28.648
12.2812	0.133	-1.806	-58.948	-28.85	-34.409	-26.961
12.2882	0.148	-2.613	-59.767	-41.353	-35.345	-27.18
12.2951	0.269	-2.817	-70.096	-38.66	-37.603	-25.55
12.3021	-0.299	-3.548	-71.85	-49.188	-47.315	-29.719
12.309	-0.58	-2.571	-70.969	-45.483	-55.947	-36.05
12.316	-0.577	-1.957	-69.294	-55.27	-54.1	-35.661
12.3229	-0.06	-1.826	-53.272	-65.337	-52.254	-41.742
12.3299	-0.042	-3.295	-50.289	-66.262	-57.582	-41.716
12.3368	-0.138	-5.112	-35.895	-66.634	-55.739	-40.111
12.3438	-0.119	-4.977	-37.641	-75.654	-63.283	-40.981
12.3507	-1.421	-4.253	-32.541	-71.919	-65.332	-43.452
12.3576	-0.151	-4.118	-27.554	-68.212	-63.511	-43.246
12.3646	-0.145	-4.028	-15.019	-69.841	-66.183	-45.888
12.3715	-0.135	-4.929	-6.63	-80.833	-74.492	-44.202
12.3785	0.138	-5.302	-5.393	-87.104	-72.61	-42.517
12.3854	-0.868	-5.225	-11.844	-85.045	-75.061	-42.957
12.3924	-1.8	-5.099	-18.231	-90.948	-74.269	-46.195
12.3993	-1.786	-4.915	-17.546	-94.015	-81.2	-50.102
12.4062	-1.213	-4.782	-17.105	-100.494	-79.365	-50.593
12.4132	-0.752	-5.194	-16.497	-99.343	-81.972	-52.157
12.4201	-1.188	-5.069	-25.39	-100.537	-86.341	-50.459
12.4271	-1.934	-6.069	-42.91	-100.085	-85.124	-52.618
12.434	-1.962	-5.689	-46.346	-96.48	-83.268	-53.83
12.441	-2.795	-6.64	-57.46	-101.829	-86.689	-53.916
12.4479	-2.801	-6.42	-74.272	-107.815	-86.23	-52.28
12.4549	-2.775	-6.3	-75.43	-108.018	-91.337	-50.685
12.4618	-1.857	-6.18	-79.598	-105.311	-89.537	-53.471
12.4688	-1.83	-5.571	-89.288	-106.753	-83.45	-56.967
12.4757	-1.634	-6.1	-88.229	-108.637	-81.655	-55.412
12.4826	-3.477	-6.211	-89.126	-105.483	-89.306	-58.481
12.4896	-2.697	-6.382	-86.153	-112.943	-87.842	-53.728
12.4965	-2.684	-6.269	-84.881	-113.196	-88.402	-55.403
12.5035	-2.672	-6.392	-76.189	-112.457	-86.68	-54.967
12.5104	-2.371	-6.331	-66.519	-114.366	-82.752	-58.053
12.5174	-2.368	-6.627	-50.906	-114.726	-73.998	-52.047
12.5243	-1.738	-7.364	-49.537	-116.718	-79.315	-50.954
12.5312	-2.335	-7.256	-48.17	-110.551	-81.452	-49.535
12.5382	-3.988	-6.58	-29.914	-113.196	-80.076	-48.136
12.5451	-3.97	-6.475	-24.371	-110.191	-78.533	-51.398
12.5521	-2.097	-6.37	-23.234	-107.694	-75.004	-47.71
12.559	-2.08	-5.457	-20.323	-104.777	-73.533	-46.625
12.566	-2.067	-5.105	-22.047	-101.745	-73.723	-45.353
12.5729	-1.248	-4.996	-15.733	-102.464	-75.679	-47.691
12.5799	-1.232	-4.993	-20.861	-99.479	-70.878	-46.436
12.5868	-2.351	-4.89	-20.487	-96.609	-59.341	-42.99
12.5938	-2.335	-5.318	-22.425	-95.046	-57.954	-41.833
12.6007	-3.081	-5.979	-27.27	-92.209	-59.225	-43.161
12.6076	-2.318	-5.894	-30.117	-87.78	-57.933	-42.01
12.6146	-2.302	-3.283	-39.415	-84.913	-50.228	-35.192
12.6215	-0.849	-3.205	-48.918	-76.511	-47.143	-28.775
12.6285	-0.441	-3.798	-51.029	-73.866	-45.984	-27.673
12.6354	-0.806	-3.724	-53.146	-70.716	-33.491	-28.797
12.6424	-1.262	-3.605	-59.951	-69.027	-32.39	-29.188
12.6493	-1.382	-2.636	-59.572	-67.521	-24.126	-26.746
12.6562	-1.371	-0.138	-52.202	-65.094	-23.036	-24.653
12.6632	-1.103	-2.466	-50.037	-58.481	-22.082	-21.13
12.6701	1.015	-2.727	-40.03	-55.681	-21.129	-18.478
12.6771	-0.244	-2.655	-38.2	-53.464	-20.324	-15.08
12.684	-0.23	-0.524	-30.84	-50.508	-16.64	-12.587
12.691	-0.54	-0.452	-24.093	-44.681	1.6	-13.39
12.6979	-1.02	0.111	-15.486	-42.584	2.897	-10.965

## Sheet: G
	Amplitude (Day5-10)	average	SD
	27.69	33.7667	9.69719
Mock-transduced	28.66
	44.95
	69.78	69.31	13.5711
CLOCK-transduced	82.64
	55.51
