# Supplementary material for: Post-transcriptional repression of circadian component CLOCK regulates cancer-stemness in murine breast cancer cells
Source: eLife. 2021 Apr 23;10:e66155. doi: 10.7554/eLife.66155 (PMC8102063; doi:10.7554/eLife.66155)
Supplement: Figure 2—figure supplement 1—source data 1. [file elife-66155-fig2-figsupp1-data1.xlsx]

## Sheet: Contents
Ogino and Matsunaga et al eLife
Supplemental Figure S2 - Source Data File 1
A - Supplemental Figure S2B: The expression levels of C/EBPα mRNA in enhanced CLOCK-expression 4T1 cells
B - Supplemental Figure S2D: Repression of Aldh3a1 transcriptional activity by C/EBPα
C - Supplemental Figure S2E: Repression of Aldh3a1 protein expression by C/EBPα
D - Supplemental Figure S2F: Enhanced expression of Aldh3a1 in C/EBPα-downregulated 4T1 cells

## Sheet: A
	Replicate	Ratio of Cebpa/18s rRNA	Average	SD
Mock-transduced 4T1	1	0.802044	1	0.208225
	2	1.21716
	3	0.980794
CLOCK-expressing 4T1	1	6.01886	5.50065	1.35106
	2	6.51589
	3	3.96721

## Sheet: B
	Replicate	Relative ratio of Luc/Rluc	Average	SD
pcDNA	1	0.952628	1	0.0459424
	2	1.04436
	3	1.00301
C/EBPa	1	0.568035	0.509376	0.0520025
	2	0.468926
	3	0.491168

## Sheet: C
	Replicate	Relative ratio of Aldh3a1/Actin	Average	SD
pcDNA	1	0.981232	1	0.130739
	2	1.13911
	3	0.879659
C/EBPa	1	0.593828	0.534505	0.051989
	2	0.512813
	3	0.496876

## Sheet: D
	Replicate	Relative ratio of Aldh3a1/Actin	Average	SD
pcDNA	1	0.872605	1	0.160041
	2	1.17963
	3	0.947762
C/EBPa KD	1	1.41875	1.52199	0.0924329
	2	1.59706
	3	1.55015
