# Supplementary material for: Post-transcriptional repression of circadian component CLOCK regulates cancer-stemness in murine breast cancer cells
Source: eLife. 2021 Apr 23;10:e66155. doi: 10.7554/eLife.66155 (PMC8102063; doi:10.7554/eLife.66155)
Supplement: Figure 2—source data 1. [file elife-66155-fig2-data1.xlsx]

## Sheet: Contents
Ogino and Matsunaga et al eLife
Figure 2 - Source Data File 1
A - Figure 2A: CLOCK protein levels in mock-transduced and Clock-expressing lentivirus-infected 4T1 cells
B - Figure 2B: The flow cytometric analysis of ALDEFLUOR assay of CLOCK-expressing 4T1 cells
C - Figure 2C: Difference in the mRNA levels of ALDH isoforms between mock-transduced and CLOCK-expressing 4T1 cells
D - Figure 2D: The mRNA levels of stemness-related genes in ALDH-positive mock-transduced and CLOCK-expressing 4T1 cells
E - Figure 2E: Difference in growth ability between mock-transduced and CLOCK-expressing 4T1 cells
F - Figure 2F: Difference in the spheroid formation ability between mock-transduced and CLOCK-expressing 4T1 cells

## Sheet: A
	Replicate	Ratio of CLOCK/p84	Average	SD
Mock-transduced	1	0.877483	1	0.106956
	2	1.07474
	3	1.04778
CLOCK-expressing	1	3.27633	3.28932	0.228146
	2	3.06794
	3	3.52368

## Sheet: B
	Replicate	Ratio of ALDH-positive/ALDH-negative cells	Average	SD
Mock-transduced	1	1.15128	1	0.135053
	2	1.177
	3	0.94666
	4	0.83204
	5	0.936416
	6	0.956604
CLOCK-expressing	1	0.138685	0.172345	0.0399941
	2	0.107589
	3	0.192663
	4	0.188183
	5	0.197582
	6	0.209368

## Sheet: C
		Log2(expression ratio: CLOCK-expressing/Mock-transduced)	Average	SD
Aldh2	1	0.316884	0.486509	0.165127
	2	0.495905
	3	0.646738
Aldh3a1	1	-1.73549	-1.74863	0.175785
	2	-1.93061
	3	-1.57978
Aldh3a2	1	0.554683	0.58383	0.0265768
	2	0.590089
	3	0.60672
Aldh3b1	1	-0.1093	0.0100745	0.108137
	2	0.0380468
	3	0.101477
Aldh5a1	1	0.523599	0.544015	0.020775
	2	0.543315
	3	0.565131

## Sheet: D
	Replicate	Ratio of Klf4/18s rRNA	Average	SD
Mock-transduced	1	1.05489	1	0.0484627
	2	0.981988
	3	0.963122
CLOCK-expressing	1	0.66743	0.699704	0.02839
	2	0.710864
	3	0.72082
	Replicate	Ratio of Nanog/18s rRNA	Average	SD
Mock-transduced	1	1.13735	1	0.118996
	2	0.927867
	3	0.934787
CLOCK-expressing	1	0.392694	0.429365	0.0331707
	2	0.457278
	3	0.438123
	Replicate	Ratio of c-Myc/18s rRNA	Average	SD
Mock-transduced	1	1.00385	1	0.0264912
	2	1.02436
	3	0.971796
CLOCK-expressing	1	0.424396	0.428652	0.0148675
	2	0.416377
	3	0.445183

## Sheet: E
Mock-transduced	Replicate	growth rate	Average	SD
day0	1	0.929995	1	0.0915972
	2	0.946344
	3	1.05013
	4	0.992618
	5	1.15947
	6	0.921439
day1	1	2.18135	2.02971	0.342328
	2	1.53998
	3	1.76322
	4	1.94103
	5	2.33199
	6	2.42068
day2	1	6.83966	10.369	0.861569
	2	6.58417
	3	8.60639
	4	8.00266
	5	6.98629
day3	1	25.1946	22.1147	1.78495
	2	21.3221
	3	22.6538
	4	20.0866
	5	22.4551
	6	20.976
CLOCK-expressing	Replicate	growth rate	Average	SD
day0	1	0.764089	1	0.0823474
	2	1.28661
	3	1.20091
	4	0.875056
	5	0.908031
	6	0.965312
day1	1	1.71598	1.83576	0.0901557
	2	1.77853
	3	1.58603
	4	2.21041
	5	1.967
	6	1.7566
day2	1	4.76711	6.34827	0.135149
	2	5.31093
	3	5.33048
	4	5.51398
	5	5.48982
day3	1	11.6773	12.6804	0.55287
	2	12.1108
	3	11.1525
	4	13.5294
	5	14.8667
	6	12.7459

## Sheet: F
	number of spheroid formed by Mock-transduced 4T1
area of spheroid (nm2)	1	2	3	Average	SD
8000~	20	19	37	25.3333	10.116
6000~7999	35	35	47	39	6.9282
4000~5999	127	104	145	125.333	20.5508
2000~3999	246	242	229	239	8.88819
~1999	215	215	197	209	10.3923
total number	643	615	655	637.667	20.5264
	number of spheroid formed by CLOCK-expressing 4T1
area of spheroid (nm2)	1	2	3	Average	SD
8000~	16	8	13	12.3333	4.04145
6000~7999	24	20	26	23.3333	3.05505
4000~5999	43	38	43	41.3333	2.88675
2000~3999	92	84	97	91	6.55744
~1999	130	158	135	141	14.9332
total number	305	308	314	309	4.58258
