# Supplementary material for: Post-transcriptional repression of circadian component CLOCK regulates cancer-stemness in murine breast cancer cells
Source: eLife. 2021 Apr 23;10:e66155. doi: 10.7554/eLife.66155 (PMC8102063; doi:10.7554/eLife.66155)
Supplement: Figure 3—source data 1. [file elife-66155-fig3-data1.xlsx]

## Sheet: Contents
Ogino and Matsunaga et al eLife
Figure 3 - Source Data File 1
A - Figure 3A: Decrease in the invasion ability of CLOCK-expressing 4T1 cells
B - Figure 3D: Differential expression of EMT-related molecules between mock-transduced and CLOCK-expressing 4T1 cells

## Sheet: A
		area of invasion(µm2)	Average	SD
Mock-transduced	1	20.344	14.1147	6.42414
	2	14.488
	3	7.512
CLOCK-expressing	1	4.403	2.85667	1.37722
	2	1.762
	3	2.405

## Sheet: B
	Replicate	Ratio of E-cadherin/18s rRNA	Average	SD
Mock-transduced	1	0.909441	1	0.100682
	2	0.982143
	3	1.10842
CLOCK-expressing	1	3.49047	3.3718	0.102797
	2	3.31022
	3	3.31471
	Replicate	Ratio of Claudin1/18s rRNA	Average	SD
Mock-transduced	1	0.74232	1	0.402671
	2	0.793662
	3	1.46402
CLOCK-expressing	1	8.12324	7.62452	0.486916
	2	7.15034
	3	7.59997
	Replicate	Ratio of Vimentin/18s rRNA	Average	SD
Mock-transduced	1	0.880821	1	0.181429
	2	0.910379
	3	1.2088
CLOCK-expressing	1	0.360427	0.336051	0.0335974
	2	0.297726
	3	0.35
	Replicate	Ratio of Snail1/18s rRNA	Average	SD
Mock-transduced	1	0.879544	1	0.118278
	2	1.00448
	3	1.11597
CLOCK-expressing	1	0.737367	0.773447	0.0682586
	2	0.7308
	3	0.852174
	Replicate	Ratio of Twist1/18s rRNA	Average	SD
Mock-transduced	1	0.940873	1	0.164217
	2	0.873534
	3	1.18559
CLOCK-expressing	1	0.79926	0.662815	0.118845
	2	0.581893
	3	0.607292
