# Supplementary material for: Post-transcriptional repression of circadian component CLOCK regulates cancer-stemness in murine breast cancer cells
Source: eLife. 2021 Apr 23;10:e66155. doi: 10.7554/eLife.66155 (PMC8102063; doi:10.7554/eLife.66155)
Supplement: Figure 4—source data 1. [file elife-66155-fig4-data1.xlsx]

## Sheet: Contents
Ogino and Matsunaga et al eLife
Figure 4 - Source Data File 1
A - Figure 4A: The ability of tumor growth in mice implanted with mock-transduced or CLOCK-expressing 4T1 cells
B - Figure 4B: The quantitation of Ki-67 immnohistochemical stainning
C - Figure 4C: The number of pulmonary tumor colonies in mice implanted with mock-transduced or CLOCK-expressing 4T1 cells
D - Figure 4D: The number of tumor colonies derived from bone in mice implanted with mock-transduced or CLOCK-expressing 4T1 cells

## Sheet: A
Mock-transduced 4T1	1week	2week	3week	4week	5week	ND=Not detected
1	92.2625	267.188	513.422	1211.39	1501.59
2	45.496	415.152	659.016	1146.88	1738.16
3	ND	61.852	229.365	432.964	592.767
4	37.926	354.025	834.272	1364.66	1971.36
5	43.56	139.425	310.4	1183	1853.78
6	37.926	204.723	784.146	1687.04	2899.71
7	ND	338.688	1353.21	2480.06	death
8	42.592	189.037	468.308	746.496	1310.72
9	ND	213.564	488.448	851.238	1254.53
Average	49.9604	242.628	626.732	1233.75	1640.33
SD	20.949	112.076	337.581	592.822	668.14
CLOCK-expressing 4T1	1week	2week	3week	4week	5week
1	ND	45.496	138.915	225.504	585.844
2	ND	37.8225	72.5	241.875	473.812
3	ND	21.504	79.768	249.64	384.75
4	ND	37.8225	68.9265	265.6	227.85
5	34.4605	109.651	295.312	437.113	1148.23
6	ND	32.49	164.775	183.996	326.4
7	ND	ND	77.315	156.282	255.938
8	ND	ND	ND	75.843	94.221
9	ND	23.275	34.4	67.626	102.602
Average	34.4605	44.0088	116.489	211.498	399.961
SD	#DIV/0!	30.1572	83.3505	111.417	323.616

## Sheet: B
	Replicates	Area of Ki-67+ (um2)	Average	SD
Mock-transduced 4T1	1	110955	78733.7	26504
	2	78574
	3	84222
	4	76834
	5	90949
	6	30868
CLCOK-expressing 4T1	1	832	8927.33	7412.85
	2	10065
	3	80
	4	12325
	5	19666
	6	10596

## Sheet: C
	Replicates	number of tumor colony	Average	SD
Mock-transduced 4T1	1	30	23.7143	18.5357
	2	18
	3	4
	4	49
	5	46
	6	4
	7	15
CLCOK-expressing 4T1	1	1	1.55556	1.81046
	2	2
	3	1
	4	5
	5	0
	6	4
	7	0
	8	0
	9	1

## Sheet: D
	Replicates	Area of tumor colony (um2)	Average	SD
Mock-transduced 4T1	1	5933478	1.61947e+07	1.17729e+07
	2	18057313
	3	2226657
	4	27546299
	5	9497050
	6	16513040
	7	11829462
	8	37953931
CLCOK-expressing 4T1	1	218563	80342.4	88058.1
	2	1766
	3	70235
	4	179037
	5	144001
	6	8957
	7	1766
	8	18414
