# Supplementary material for: Post-transcriptional repression of circadian component CLOCK regulates cancer-stemness in murine breast cancer cells
Source: eLife. 2021 Apr 23;10:e66155. doi: 10.7554/eLife.66155 (PMC8102063; doi:10.7554/eLife.66155)
Supplement: Figure 5—source data 1. [file elife-66155-fig5-data1.xlsx]

## Sheet: Contents
Ogino and Matsunaga et al eLife
Figure 5 - Source Data File 1
A - Figure 5A: Comparison of the promoter activity of the mouse Clock gene between ALDH-negative and -positive 4T1 cells
B - Figure 5B: The mRNA expression of the Luciferase gene in ALDH-negative and -positive 4T1 cells transfected with luciferase reporter constructs containing varying lengths of the 3’UTR of the Clock gene

## Sheet: A
	Replicate	Ratio of Luciferase mRNA levels	Average	SD
ALDH-negative cells	1	1.01778	1	0.0153994
	2	0.991109
	3	0.991109
ALDH-positive cells	1	1.29197	1.29347	0.0531602
	2	1.34736
	3	1.24108

## Sheet: B
		Replicate	Ratio of Luciferase mRNA levels	Average	SD
pGL4.13	ALDH-negative cells	1	1.08496	1	0.0809083
		2	0.923868
		3	0.991172
	ALDH-positive cells	1	1.27414	1.26058	0.242796
		2	1.49631
		3	1.01129
3'UTR Full	ALDH-negative cells	1	1.08496	1	0.0809083
		2	0.923868
		3	0.991172
	ALDH-positive cells	1	0.176309	0.192239	0.0176754
		2	0.189153
		3	0.211254
3'UTR 1st	ALDH-negative cells	1	1.45768	1	0.419679
		2	0.909102
		3	0.633218
	ALDH-positive cells	1	0.371816	0.405409	0.0372754
		2	0.398903
		3	0.44551
3'UTR 2nd	ALDH-negative cells	1	1.34177	1	0.297846
		2	0.795818
		3	0.862414
	ALDH-positive cells	1	0.820167	1.16292	0.372882
		2	1.10863
		3	1.55998
3'UTR 3rd	ALDH-negative cells	1	1.3124	1	0.307824
		2	0.990627
		3	0.69697
	ALDH-positive cells	1	0.255234	0.438797	0.173259
		2	0.46168
		3	0.599477
3'UTR 4th	ALDH-negative cells	1	1.45768	1	0.419679
		2	0.909102
		3	0.633218
	ALDH-positive cells	1	1.10498	1.20481	0.110777
		2	1.18548
		3	1.32399
