# Supplementary material for: Post-transcriptional repression of circadian component CLOCK regulates cancer-stemness in murine breast cancer cells
Source: eLife. 2021 Apr 23;10:e66155. doi: 10.7554/eLife.66155 (PMC8102063; doi:10.7554/eLife.66155)
Supplement: Figure 6—figure supplement 1—source data 1. [file elife-66155-fig6-figsupp1-data1.xlsx]

## Sheet: Contents
Ogino and Matsunaga et al eLife
Supplemental Figure S3 - Source Data File 1
A - Supplemental Figure S3A: Influence of the miR-182::hairpin inhibitor on luciferase activity of Clock 3’UTR 1st::Luc

## Sheet: A
	Replicate	Ratio of luciferase activity	Average	SD
Control	1	1.05015	1	0.0802431
	2	0.907451
	3	1.0424
miR-182 inhibitor	1	1.36291	1.35297	0.00921281
	2	1.35125
	3	1.34473
