# Supplementary material for: Post-transcriptional repression of circadian component CLOCK regulates cancer-stemness in murine breast cancer cells
Source: eLife. 2021 Apr 23;10:e66155. doi: 10.7554/eLife.66155 (PMC8102063; doi:10.7554/eLife.66155)
Supplement: Figure 6—figure supplement 2—source data 1. [file elife-66155-fig6-figsupp2-data1.xlsx]

## Sheet: Contents
Ogino and Matsunaga et al eLife
Supplemental Figure S6 - Source Data File 1
A - Supplemental Figure S6: The influence of genomic depletion of miR-182 on the other clustered miRNAs

## Sheet: A
	Replicate	Ratio of miR-182/18s rRNA	Average	SD
naive 4T1	1	1.15061	1	0.135025
	2	0.959622
	3	0.88977
miR-182 KO 4T1 #1	1	0.00038427	0.000649452	0.000266513
	2	0.000646809
	3	0.000917277
	Replicate	Ratio of miR-96/18s rRNA	Average	SD
naive 4T1	1	1.104	1	0.13032
	2	1.04219
	3	0.853813
miR-182 KO 4T1 #1	1	5.11195	4.54244	0.520291
	2	4.42335
	3	4.09202
	Replicate	Ratio of miR-183/18s rRNA	Average	SD
naive 4T1	1	1.0437	1	0.0386411
	2	0.985949
	3	0.97035
miR-182 KO 4T1 #1	1	12.7924	13.1195	0.377782
	2	13.033
	3	13.533
