# Supplementary material for: Post-transcriptional repression of circadian component CLOCK regulates cancer-stemness in murine breast cancer cells
Source: eLife. 2021 Apr 23;10:e66155. doi: 10.7554/eLife.66155 (PMC8102063; doi:10.7554/eLife.66155)
Supplement: Figure 6—source data 1. [file elife-66155-fig6-data1.xlsx]

## Sheet: Contents
Ogino and Matsunaga et al eLife
Figure 6 - Source Data File 1
A - Figure 6B: The expression levels of mmu-miR-182 in ALDH-negative and -positive cells
B - Figure 6C: Influence of knockout of miR-182 on the expression levels of Clock mRNA

## Sheet: A
	Replicate	Ratio of miR-182/beta-actin	Average	SD
ALDH-negative cells	1	1.45951	1	0.310946
	2	1.15523
	3	0.671709
	4	0.893553
	5	0.819998
ALDH-positive cells	1	1.68351	2.14749	0.591476
	2	1.54478
	3	2.21772
	4	3.04537
	5	2.24606

## Sheet: B
		Replicate	Ratio of Clock/18s rRNA	Average	SD
ALDH-negative cells	naive	1	1.15121	1	0.246204
		2	0.715904
		3	1.13289
	miR-182 KO #1	1	0.999605	1	0.0210733
		2	1.02127
		3	0.979127
	miR-182 KO #2	1	0.828282	1	0.268165
		2	1.30901
		3	0.862706
	miR-182 KO #3	1	0.910467	1	0.156712
		2	1.18095
		3	0.90858
ALDH-positive cells	naive	1	0.401922	0.404929	0.0174123
		2	0.389216
		3	0.423649
	miR-182 KO #1	1	1.2496	1.22566	0.0390659
		2	1.18058
		3	1.2468
	miR-182 KO #2	1	0.853448	0.801398	0.0452579
		2	0.779416
		3	0.771329
	miR-182 KO #3	1	0.765859	0.89452	0.129068
		2	0.89371
		3	1.02399
