# Supplementary material for: Post-transcriptional repression of circadian component CLOCK regulates cancer-stemness in murine breast cancer cells
Source: eLife. 2021 Apr 23;10:e66155. doi: 10.7554/eLife.66155 (PMC8102063; doi:10.7554/eLife.66155)
Supplement: Figure 7—figure supplement 1—source data 1. [file elife-66155-fig7-figsupp1-data1.xlsx]

## Sheet: Contents
Ogino and Matsunaga et al eLife
Supplemental Figure S4 - Source Data File 1
A - Supplemental Figure S4A: The mRNA expression levels of Clock derived from whole tumor
B - Supplemental Figure S4B: The mRNA expression levels of Clock derived from each sorted ALDH-negative cells or ALDH-positive cells

## Sheet: A
	Replicate	Relative ratio of Clock/18s rRNA	Average	SD
naive 4T1	1	1.00965	1	0.00985139
	2	1.0004
	3	0.989954
miR-182 KO 4T1 #1	1	1.36654	1.42215	0.0506415
	2	1.4343
	3	1.46561

## Sheet: B
		Replicate	Relative ratio of Clock/b-Actin	Average	SD
naive 4T1	ALDH-negative	1	1.03469	1	0.0248153
		2	1.0134
		3	0.951916
	ALDH-positive	1	0.44264	0.470085	0.0647909
		2	0.593482
		3	0.374132
miR-182 KO 4T1 #1	ALDH-negative	1	1.05915	1	0.0563984
		2	0.946827
		3	0.994024
	ALDH-positive	1	1.60949	1.75361	0.127617
		2	1.85227
		3	1.79906
