# Supplementary material for: Post-transcriptional repression of circadian component CLOCK regulates cancer-stemness in murine breast cancer cells
Source: eLife. 2021 Apr 23;10:e66155. doi: 10.7554/eLife.66155 (PMC8102063; doi:10.7554/eLife.66155)
Supplement: Figure 7—source data 1. [file elife-66155-fig7-data1.xlsx]

## Sheet: Contents
Ogino and Matsunaga et al eLife
Figure 7 - Source Data File 1
A - Figure 7A: The ability of tumor growth in mice implanted with naive or miR-182 KO 4T1 cells
B - Figure 7B: The number of pulmonary tumor colonies in mice implanted with naive or miR-182 KO 4T1 cells
C - Figure 7C: The number of tumor colonies derived from bone in mice implanted with naive or miR-182 KO 4T1 cells
D - Figure 7D: The organ distribution of miR-182 in naive 4T1-bearing mice

## Sheet: A
naive 4T1	1week	2week	3week	4week	ND=Not detected
1	ND	201.81	757.424	2171.7
2	ND	329.122	1282.45	death
3	ND	292.783	610	1265.9
4	97.47	433.2	1123.2	2378.63
5	56.448	481.562	1393.92	3288.6
6	56.3295	254.144	547.832	1402.63
7	ND	414.736	592.457	1411.15
8	ND	410.828	862.47	2989.18
9	56.3295	282.123	905.06	1871.42
10	47.5875	233.928	624.26	1850.2
Average	62.8329	333.423	869.908	2069.94
SD	19.7326	95.6336	303.953	711.448
miR-182 KO 4T1 #1	1week	2week	3week	4week
1	50.784	237.276	578.259	1166.95
2	80.19	152.46	503.338	1565.48
3	40.344	183.996	306.561	961
4	44.528	186.517	387.2	1471.97
5	56.448	228.152	236.927	618.52
6	39.7535	277.725	436.364	715
7	ND	128.774	456.192	2109.46
8	65	198.45	451.314	1064.21
9	46.575	228.267	654.368	1372.88
Average	52.9528	202.402	445.614	1227.27
SD	13.881	45.7489	127.981	462.04

## Sheet: B
	Replicates	number of tumor colony	Average	SD
naive 4T1	1	77	56.3333	33.1889
	2	55
	3	57
	4	134
	5	24
	6	27
	7	42
	8	44
	9	47
miR-182 KO #1 4T1	1	28	20.5556	13.5657
	2	53
	3	20
	4	20
	5	9
	6	15
	7	16
	8	16
	9	8

## Sheet: C
	Replicates	Area of tumor colony (um2)	Average	SD
naive 4T1	1	14023507	1.62568e+07	6.63679e+06
	2	27020415
	3	15038815
	4	36460695
	5	47134265
	6	2969149
miR-182 KO #1 4T1	1	1004620	1.63242e+06	666433
	2	4614660
	3	978893
	4	484289
	5	1278368
	6	57228

## Sheet: D
	Replicates	Ratio of miR-182/18s rRNA	Average	SD
	1	942.799	989.813	299.494
Tumor	2	716.607
	3	1310.03
	1	52.7086	43.9011	7.71511
mammary fat pad	2	38.3378
	3	40.657
	1	2.38835	2.1313	0.70866
Liver	2	1.32999
	3	2.67556
	1	32.8419	29.5429	6.19136
Kidney	2	33.3862
	3	22.4007
	1	205.552	312.67	186.461
Brain	2	527.976
	3	204.482
	1	1.1678	1	0.270627
Bone marrow	2	0.6878
	3	1.1444
