# Supplementary material for: Post-transcriptional repression of circadian component CLOCK regulates cancer-stemness in murine breast cancer cells
Source: eLife. 2021 Apr 23;10:e66155. doi: 10.7554/eLife.66155 (PMC8102063; doi:10.7554/eLife.66155)
Supplement: Supplementary file 1. [file elife-66155-supp1.xlsx]

## Sheet: Sheet1
	Mouse Clock	Forward primer	5'-TTGCTCCACGGGAATCCTT-3'
		Reverse primer	5'-GGAGGGAAAGTGCTCTGTTGTAG-3'
	Mouse Aldh2	Forward primer	5'-TTCCCACCGTCAACCCTTC-3'
		Reverse primer	5'-CCAATCGGTACAACAGCCG-3'
	Mouse Aldh3a1	Forward primer	5'-TGGCAAAGACTCGTCAGAC-3'
		Reverse primer	5'-AGTTCCAAGCACCTATGACAAG-3'
	Mouse Aldh3a2	Forward primer	5'-TTCCGATTGCAGCAGCTTGA-3'
		Reverse primer	5'-TCGCAGAAGCCAATTCAGGA-3'
	Mouse Aldh3b1	Forward primer	5'-GCAAGGCCACTGAAAAGATACT-3'
		Reverse primer	5'-GCCTACATAAGCATTCCCTGTG-3'
	Mouse Aldh5a1	Forward primer	5'-TGGTGGTGAAACCTGCTGAAG-3'
		Reverse primer	5'-TGGATCGGTACACAGGACCTC-3'
	Mouse Klf4	Forward primer	5'-CAGAGGAGCCCAAGCCAAAG-3'
		Reverse primer	5'-CGGTAGTGCCTGGTCAGTTC-3'
	Mouse Nanog	Forward primer	5'-CAGGTGTTTGAGGGTAGCTC-3'
		Reverse primer	5'-CGGTTCATCATGGTACAGTC-3'
	Mouse c-Myc	Forward primer	5'-TGATGTGGTGTCTGTGGAGAAG-3'
		Reverse primer	5'-CGTAGTTGTGCTGGTGAGTGG-3'
	Mouse E-cadherin	Forward primer	5'-CAGTTCCGAGGTCTACACCTT-3'
		Reverse primer	5'-TGAATCGGGAGTCTTCCGAAA-3'
	Mouse Claudin1	Forward primer	5'-GCCATCTACGAGGGACTGTG-3'
		Reverse primer	5'-CCCCAGCAGGATGCCAATTA-3'
	Mouse Vimentin	Forward primer	5'-TCCAGAGAGAGGAAGCCGAA-3'
		Reverse primer	5'-AAGGTCAAGACGTGCCAGAG-3'
	Mouse Snail1	Forward primer	5'-GTCTGCACGACCTGTGGAAA-3'
		Reverse primer	5'-GGTCAGCAAAAGCACGGTTG-3'
	Mouse Twist1	Forward primer	5'-CCCACACCTCTGCATTCTGAT-3'
		Reverse primer	5'-CAGTGGCTGATTGGCAAGAC-3'
	Mouse 18s rRNA	Forward primer	5'-CGGCTACCACATCCAAGGAA-3'
		Reverse primer	5'-GCTGGAATTACCGCGGCT-3'
	Mouse β-actin	Forward primer	5'-ACTGTCGAGTCGCGTCC-3'
		Reverse primer	5'-CGCAGCGATATCGTCATCCAT-3'
	Luciferase	Forward primer	5'-CAGCGAGAATAGCTTGCAGT-3'
		Reverse primer	5'-AGGATCTTTTGCAGCCCTTT-3'
	Renilla Luciferase	Forward primer	5'-GAGAAGGGCGAGGTTAGACG-3'
		Reverse primer	5'-CCCGAAGGTAGGCGTTGTAG-3'
	Neomycin Phosphotransferase	Forward primer	5'-AACTGTTCGCCCGACTGAAA-3'
	(Neor)	Reverse primer	5'-AGTCGATGAAGCCGGAGAAG-3'
	Mouse Bmal1	Forward primer	5'-GGACTTCGCCTCTACCTGTTCA-3'
		Reverse primer	5'-AACCATGTGCGAGTGCAGGCGC-3'
	Mouse Cry1	Forward primer	5'-AAGTCATCGTGCGCATTTCA-3'
		Reverse primer	5'-TCATCATGGTCATCAGACAGA-3'
	Mouse Per1	Forward primer	5'-CCAGATTGGTGGAGGTTACTGAGT-3'
		Reverse primer	5'-GCGAGAGTCTTCTTGGAGCAGTAG-3'
	Mouse Per2	Forward primer	5'-GACTGCGACGACAATGGGAA-3'
		Reverse primer	5'-TTTGGCAGACTGCTCACTACT-3'
	Mouse Cebpα	Forward primer	5'-GCGGGAACGCAACAACATC-3'
		Reverse primer	5'-GTCACTGGTCAACTCCAGCAC-3'
