# Supplementary material for: Post-transcriptional repression of circadian component CLOCK regulates cancer-stemness in murine breast cancer cells
Source: eLife. 2021 Apr 23;10:e66155. doi: 10.7554/eLife.66155 (PMC8102063; doi:10.7554/eLife.66155)
Supplement: Supplementary file 2. — Clock promoter regions in microarray analysis of ALDH-positive and -negative 4T1 cells. [file elife-66155-supp2.xlsx]

## Sheet: Sheet1
GeneSymbol	Signal		Z-score	Fold change
	ALDH-negative cells	ALDH-positive cells
Clock	313.095	206.372	-2.05221	0.659136
Rorb	17.4974	14.6856	-0.216329	0.839299
Rorc	349	355.162	0.0300901	1.01766
Nr1d1	228.453	260.631	0.577946	1.14085
Nr1d2	831.016	835.355	-0.020506	1.00522
Rara	5343.59	5966.64	0.762536	1.1166
Rxra	28.2854	32.1546	0.312752	1.13679
Max	5491.94	5413.34	-0.117916	0.985687
