# Supplementary material for: Post-transcriptional repression of circadian component CLOCK regulates cancer-stemness in murine breast cancer cells
Source: eLife. 2021 Apr 23;10:e66155. doi: 10.7554/eLife.66155 (PMC8102063; doi:10.7554/eLife.66155)
Supplement: Supplementary file 3. — Clock expression in ALDH-positive and -negative 4T1 cells in microarray analysis. [file elife-66155-supp3.xlsx]

## Sheet: Sheet1
miRNA	Signal		Fold change
	ALDH-negative cells	ALDH-positive cells
mmu-miR-182	216.767	608.874	2.80889
mmu-miR-17	814.629	1168.14	1.43396
mmu-miR-1306	3.65533	3.22657	0.882703
mmu-miR-290a	2.11404	1.50525	0.712025
mmu-miR-291a	1.90528	2.46229	1.29235
mmu-miR-291b	1.76541	2.49666	1.41421
mmu-miR-292b	3.09513	3.43426	1.10957
mmu-miR-293	2.20381	1.90528	0.864537
mmu-miR-294	2.15846	2.41162	1.11729
mmu-miR-295	1.79005	2.46229	0.726986
mmu-miR-211	2.15846	2.65737	1.23114
